# Supplementary material for: Accelerated evolution of SARS-CoV-2 in free-ranging white-tailed deer
Source: Research Square preprint supplement (doi:10.21203/rs.3.rs-2574993/v1), 2023-02-16
Supplement: Supplementary file 1 [file 2fa9b94baaee92404a372a0b.xlsx]

## Sheet: Table_S8
POS	REF	ALT	Protein change	gene	EventsInClusters	SamplesWithMutationInClusters	NumberOfSamplesInClustersWithMutation	LineagesClusters	AY.3	AY.25	AY.44	AY.75	AY.103	B.1.617.2	B.1.1.7	SingletonsWithMutation	NumberOfSingletonsWithMutation	LineagesSingletons	Dataset
335	C	T	ORF1ab:R24C	ORF1ab	2	deer/USA/OH-OSU-1459/2021,deer/USA/OH-OSU-1490/2021,deer/USA/OH-OSU-1480/2021,deer/USA/NY-WTD_164487/2021	4	B.1.1.7	-	-	-	-	-	-	0.00159963				Alpha
7334	C	T	ORF1ab:H2357Y	ORF1ab	3	deer/USA/OH-OSU-1335/2021,deer/USA/OH-OSU-2153/2021,deer/USA/NY-WTD_164487/2021,deer/USA/NY-WTD_164412/2021	4	B.1.1.7	-	-	-	-	-	-	7.74154e-05				Alpha
9711	C	T	ORF1ab:S3149F	ORF1ab	2	deer/USA/NY-WTD_165681/2021,deer/USA/NY-WTD_164487/2021,deer/USA/NY-WTD_164412/2021	3	B.1.1.7	-	-	-	-	-	-	0.000200062				Alpha
11195	C	T	ORF1ab:L3644F	ORF1ab	2	deer/USA/NY-WTD_164557/2021,deer/USA/NY-WTD_164472/2021,deer/USA/OH-OSU-1459/2021,deer/USA/NY-WTD_164489/2021,deer/USA/NY-WTD_164468/2021	5	B.1.1.7	-	-	-	-	-	-	0.00233464				Alpha
11750	C	T	ORF1ab:L3829F	ORF1ab	3	deer/USA/NY-WTD_119997/2021,deer/USA/NY-WTD_165892/2021,deer/USA/NY-WTD_165920/2021,deer/USA/NY-WTD_119480/2021,deer/USA/NY-WTD_165681/2021	5	B.1.1.7	-	-	-	-	-	-	0.0324318				Alpha
12357	C	T	ORF1ab:T4031I	ORF1ab	3	deer/USA/NY-WTD_119997/2021,deer/USA/NY-WTD_165892/2021,deer/USA/NY-WTD_165920/2021,deer/USA/NY-WTD_119567/2021,deer/USA/NY-WTD_149849/2021,deer/USA/NY-WTD_119607/2021,deer/USA/NY-WTD_165681/2021,deer/USA/NY-WTD_164487/2021,deer/USA/NY-WTD_164412/2021	9	B.1.1.7	-	-	-	-	-	-	0.00545822				Alpha
12789	C	T	ORF1ab:T4175I	ORF1ab	3	deer/USA/NY-WTD_149911/2021,deer/USA/OH-OSU-1331/2021,deer/USA/NY-WTD_152918/2021,deer/USA/NY-WTD_164458/2021,deer/USA/NY-WTD_165621/2021	5	B.1.1.7	-	-	-	-	-	-	0.00187972				Alpha
15212	C	T	ORF1ab:T4983I	ORF1ab	2	deer/USA/NY-WTD_155877/2021,deer/USA/OH-OSU-1459/2021,deer/USA/OH-OSU-1490/2021,deer/USA/OH-OSU-1480/2021	4	B.1.1.7	-	-	-	-	-	-					Alpha
16537	G	A	ORF1ab:D5425N	ORF1ab	2	deer/USA/OH-OSU-1335/2021,deer/USA/OH-OSU-2153/2021	2	B.1.1.7	-	-	-	-	-	-					Alpha
21570	T	G	S:V3G	S	1	deer/USA/OH-OSU-1338/2021	1	B.1.1.7	-	-	-	-	-	-	0.000237465				Alpha
21597	C	T	S:S12F	S	1	deer/USA/NY-WTD_119480/2021	1	B.1.1.7	-	-	-	-	-	-	0.00169792				Alpha
21648	C	T	S:T29I	S	1	deer/USA/NY-WTD_119567/2021,deer/USA/NY-WTD_149849/2021,deer/USA/NY-WTD_119607/2021	3	B.1.1.7	-	-	-	-	-	-	0.000729792				Alpha
22299	G	T	S:R246I	S	1	deer/USA/NY-WTD_119505/2021,deer/USA/NY-WTD_119459/2021	2	B.1.1.7	-	-	-	-	-	-	0.000171358				Alpha
22301	A	G	S:S247G	S	1	deer/USA/NY-WTD_165621/2021	1	B.1.1.7	-	-	-	-	-	-					Alpha
22305	A	G	S:Y248C	S	1	deer/USA/NY-WTD_164487/2021,deer/USA/NY-WTD_164412/2021	2	B.1.1.7	-	-	-	-	-	-	NA				Alpha
22712	C	T	S:P384S	S	1	deer/USA/NY-WTD_164468/2021	1	B.1.1.7	-	-	-	-	-	-	0.000501895				Alpha
22896	T	C	S:V445A	S	1	deer/USA/NY-WTD_119997/2021,deer/USA/NY-WTD_165892/2021,deer/USA/NY-WTD_165920/2021	3	B.1.1.7	-	-	-	-	-	-	9.82915e-05				Alpha
25317	C	T	S:S1252F	S	2	deer/USA/NY-WTD_155877/2021,deer/USA/NY-WTD_119997/2021,deer/USA/NY-WTD_165892/2021,deer/USA/NY-WTD_165920/2021	4	B.1.1.7	-	-	-	-	-	-	0.000482759				Alpha
25463	C	T	ORF3a:T24I	ORF3a	2	deer/USA/OH-OSU-1335/2021,deer/USA/OH-OSU-2153/2021,deer/USA/OH-OSU-1338/2021,deer/USA/OH-OSU-1331/2021,deer/USA/OH-OSU-1490/2021,deer/USA/OH-OSU-1480/2021	6	B.1.1.7	-	-	-	-	-	-	0.000536689				Alpha
25469	C	T	ORF3a:S26L	ORF3a	2	deer/USA/OH-OSU-1459/2021,deer/USA/OH-OSU-1403/2021	2	B.1.1.7	-	-	-	-	-	-	0.00142305				Alpha
28011	C	T	ORF8:H40Y	ORF8	2	deer/USA/NY-WTD_164557/2021,deer/USA/NY-WTD_164707/2021,deer/USA/NY-WTD_155877/2021,deer/USA/NY-WTD_164472/2021,deer/USA/NY-WTD_119505/2021,deer/USA/NY-WTD_119480/2021,deer/USA/NY-WTD_164489/2021,deer/USA/NY-WTD_164468/2021,deer/USA/NY-WTD_119459/2021	9	B.1.1.7	-	-	-	-	-	-	0.000693259				Alpha
29666	C	T	ORF10:L37F	ORF10	2	deer/USA/OH-OSU-1459/2021,deer/USA/OH-OSU-1490/2021,deer/USA/OH-OSU-1480/2021,deer/USA/NY-WTD_165681/2021	4	B.1.1.7	-	-	-	-	-	-	0.00135868				Alpha
3674	A	T	ORF1ab:N1137Y	ORF1ab	2	deer/USA/OH-OSU-2069/2021,deer/USA/OH-OSU-2072/2021	2	AY.103,B.1.617.2	NA	NA	NA	NA	NA	NA	-				Delta
6573	C	T	ORF1ab:S2103F	ORF1ab	2	deer/USA/OH-OSU-2222/2021,deer/USA/OH-OSU-1710/2021,deer/USA/OH-OSU-1734/2021	3	AY.25,AY.103	0.00123132	0.00064262	0.00063978	0.00231547	0.000755329	0.00145393	-				Delta
6936	C	T	ORF1ab:S2224F	ORF1ab	3	deer/USA/OH-OSU-1099/2021,deer/USA/OH-OSU-1111/2021,deer/USA/OH-OSU-2084/2021,deer/USA/OH-OSU-2083/2021,deer/USA/OH-OSU-2070/2021,deer/USA/OH-OSU-2088/2021	6	AY.25,AY.103	0.00521258	0.000435323	0.000744472	0.000284356	0.000781488	0.000625569	-				Delta
6990	C	T	ORF1ab:S2242F	ORF1ab	2	deer/USA/OH-OSU-1114/2021,deer/USA/OH-OSU-1106/2021,deer/USA/OH-OSU-1292/2021	3	AY.25,AY.39	0.00106128	0.000912106	0.00145405	0.00280294	0.00092536	0.00152955	-				Delta
7029	C	T	ORF1ab:S2255F	ORF1ab	2	deer/USA/OH-OSU-1434/2021,deer/USA/OH-OSU-2222/2021	2	AY.25	0.000375259	0.000421504	9.69364e-05	4.06223e-05	0.000140602	7.90555e-05	-				Delta
7113	C	T	ORF1ab:T2283I	ORF1ab	3	deer/USA/OH-OSU-1950/2021,deer/USA/OH-OSU-1243/2021,deer/USA/OH-OSU-2125/2021	3	AY.25,AY.103	0.00249195	0.00124378	0.000973242	0.000406223	0.000644155	0.00256071	-				Delta
12789	C	T	ORF1ab:T4175I	ORF1ab	2	deer/USA/OH-OSU-2326/2021,deer/USA/OH-OSU-2327/2021,deer/USA/OH-OSU-2072/2021	3	AY.103,B.1.617.2	0.000920557	0.000891376	0.00201628	0.00682455	0.00118368	0.00246447	-	deer/USA/OH-OSU-1214/2021	1	AY.118	Delta
19610	C	T	ORF1ab:T6449I	ORF1ab	2	deer/USA/OH-OSU-1710/2021,deer/USA/OH-OSU-2105/2021,deer/USA/OH-OSU-2126/2021	3	AY.103	NA	NA	NA	NA	NA	NA	-				Delta
21614	C	T	S:L18F	S	6	deer/USA/OH-OSU-1114/2021,deer/USA/OH-OSU-1106/2021,deer/USA/OH-OSU-0926/2022,deer/USA/OH-OSU-2307/2021,deer/USA/OH-OSU-0716/2022,deer/USA/OH-OSU-2249/2021,deer/USA/OH-OSU-1243/2021,deer/USA/OH-OSU-1434/2021,deer/USA/OH-OSU-2069/2021,deer/USA/OH-OSU-1734/2021,deer/USA/OH-OSU-2105/2021	11	AY.25,AY.103	0.00241573	0.00271559	0.00236137	0.0069058	0.00268125	0.00313816	-	deer/USA/OH-OSU-2169/2021,deer/USA/OH-OSU-1214/2021,deer/USA/OH-OSU-1744/2021	3	AY.109,AY.118,AY.75	Delta
21648	C	T	S:T29I	S	1	deer/USA/OH-OSU-2125/2021	1	AY.25	0.000469073	0.0006288	0.000752227	0.000446846	0.00319789	0.000615258	-				Delta
21767	C	T	S:H69Y	S	2	deer/USA/OH-OSU-1703/2021,deer/USA/OH-OSU-1734/2021	2	AY.44,AY.103	0.000474937	0.000248756	0.000787124	0.000243734	0.00128177	0.00758589	-				Delta
21786	G	T	S:G75V	S	1	deer/USA/OH-OSU-2070/2021,deer/USA/OH-OSU-2088/2021	2	AY.103	0.000762244	0.000953566	0.00162853	0.000203112	0.0015172	0.00158111	-				Delta
21995	T	G	S:Y145D	S	1	deer/USA/OH-OSU-2088/2021	1	AY.103	7.0361e-05			0.000162489			-				Delta
22011	A	T	S:K150I	S	1	deer/USA/OH-OSU-2084/2021	1	AY.103		6.21891e-05					-				Delta
22988	G	A	S:G476S	S	1	deer/USA/OH-OSU-2070/2021	1	AY.103	0.000316625	0.000179657	0.000814266	0.000284356	0.000441426	0.000264664	-				Delta
23063	A	T	S:N501Y	S	2	deer/USA/OH-OSU-1793/2021,deer/USA/OH-OSU-2105/2021,deer/USA/OH-OSU-2126/2021	3	AY.44,AY.103	0.000158312	4.83693e-05	5.81619e-05	0.000284356	9.80947e-05	0.0023476	-	deer/USA/OH-OSU-1839/2021	1	AY.25.1	Delta
23142	C	T	S:P527L	S	1	deer/USA/OH-OSU-1833/2021	1	AY.44	NA	NA	NA	NA	NA	NA	-				Delta
23604	G	A	S:A681H	S	1	deer/USA/OH-OSU-0716/2022	1	AY.103	NA	NA	NA	NA	NA	NA	-				Delta
23757	C	T	S:T732I	S	2	deer/USA/OH-OSU-2084/2021,deer/USA/OH-OSU-2083/2021,deer/USA/OH-OSU-2156/2021,deer/USA/OH-OSU-2158/2021,deer/USA/OH-OSU-2324/2021	5	AY.103	0.000293171	0.000117468	0.000162853	0.000324979	0.000199459	0.000137488	-				Delta
24138	C	T	S:T859I	S	1	deer/USA/OH-OSU-1950/2021	1	AY.25	0.00256818	0.00351714	0.00124466	0.000406223	0.000650695	0.0011549	-				Delta
24914	G	C	S:D1118H	S	1	deer/USA/OH-OSU-2156/2021	1	AY.103	NA	NA	NA	8.12447e-05	NA	0.000343719	-				Delta
27509	C	T	ORF7a:T39I	ORF7a	2	deer/USA/OH-OSU-1100/2021,deer/USA/OH-OSU-1099/2021,deer/USA/OH-OSU-1111/2021,deer/USA/OH-OSU-1950/2021,deer/USA/OH-OSU-1114/2021,deer/USA/OH-OSU-2011/2021,deer/USA/OH-OSU-1106/2021,deer/USA/OH-OSU-1710/2021	8	AY.25,AY.103	0.000879513	0.000158928	0.000445908	0.0111305	0.00302132	0.000694313	-	deer/USA/OH-OSU-1744/2021	1	AY.75	Delta
29666	C	T	ORF10:L37F	ORF10	2	deer/USA/OH-OSU-1703/2021,deer/USA/OH-OSU-1828/2021,deer/USA/OH-OSU-1830/2021,deer/USA/OH-OSU-1833/2021,deer/USA/OH-OSU-1842/2021,deer/USA/OH-OSU-1793/2021,deer/USA/OH-OSU-2156/2021,deer/USA/OH-OSU-2158/2021,deer/USA/OH-OSU-2324/2021	9	AY.44,AY.103	0.000627386	0.000711719	0.0115044	0.00113743	0.000516632	0.00516954	-	deer/USA/OH-OSU-1144/2021	1	AY.3	Delta
