# Supplementary material for: Accelerated evolution of SARS-CoV-2 in free-ranging white-tailed deer
Source: Research Square preprint supplement (doi:10.21203/rs.3.rs-2574993/v1), 2023-02-16
Supplement: Supplementary file 3 [file d626afdb850cd85485a6dde4.xlsx]

## Sheet: Delta
Cluster	Ref	Pos	Before	After	Node	MutType	Codon	ProtChange	gene	Change
cluster 1	NC_045512.2	346	C	T	hCoV-19/deer/USA/OH-OSU-2072/2021\B.1.617.2\Brown\U\2021-12-04	synonymous_variant	ctC/ctT	Leu27Leu	ORF1ab	C>T
cluster 1	NC_045512.2	1889	C	T	hCoV-19/deer/USA/OH-OSU-2072/2021\B.1.617.2\Brown\U\2021-12-04	missense_variant	Cgt/Tgt	Arg542Cys	ORF1ab	C>T
cluster 1	NC_045512.2	1996	A	G	hCoV-19/deer/USA/OH-OSU-1292/2021\AY.39\Clermont\U\2021-11-06	synonymous_variant	tcA/tcG	Ser577Ser	ORF1ab	A>G
cluster 1	NC_045512.2	2662	C	T	hCoV-19/deer/USA/OH-OSU-1297/2021\B.1.617.2\Warren\U\2021-11-06	synonymous_variant	taC/taT	Tyr799Tyr	ORF1ab	C>T
cluster 1	NC_045512.2	3674	A	T	hCoV-19/deer/USA/OH-OSU-2072/2021\B.1.617.2\Brown\U\2021-12-04	missense_variant	Aat/Tat	Asn1137Tyr	ORF1ab	A>T
cluster 1	NC_045512.2	3705	C	A	hCoV-19/deer/USA/OH-OSU-1292/2021\AY.39\Clermont\U\2021-11-06	missense_variant	cCa/cAa	Pro1147Gln	ORF1ab	C>A
cluster 1	NC_045512.2	6990	C	T	hCoV-19/deer/USA/OH-OSU-1292/2021\AY.39\Clermont\U\2021-11-06	missense_variant	tCt/tTt	Ser2242Phe	ORF1ab	C>T
cluster 1	NC_045512.2	7099	T	A	hCoV-19/deer/USA/OH-OSU-2072/2021\B.1.617.2\Brown\U\2021-12-04	synonymous_variant	atT/atA	Ile2278Ile	ORF1ab	T>A
cluster 1	NC_045512.2	7303	C	T	hCoV-19/deer/USA/OH-OSU-1292/2021\AY.39\Clermont\U\2021-11-06	synonymous_variant	atC/atT	Ile2346Ile	ORF1ab	C>T
cluster 1	NC_045512.2	8371	G	C	hCoV-19/deer/USA/OH-OSU-2072/2021\B.1.617.2\Brown\U\2021-12-04	missense_variant	caG/caC	Gln2702His	ORF1ab	G>C
cluster 1	NC_045512.2	9430	C	T	hCoV-19/deer/USA/OH-OSU-1292/2021\AY.39\Clermont\U\2021-11-06	synonymous_variant	atC/atT	Ile3055Ile	ORF1ab	C>T
cluster 1	NC_045512.2	9724	C	T	NODE_0000490	synonymous_variant	ttC/ttT	Phe3153Phe	ORF1ab	C>T
cluster 1	NC_045512.2	11479	C	T	hCoV-19/deer/USA/OH-OSU-2072/2021\B.1.617.2\Brown\U\2021-12-04	synonymous_variant	atC/atT	Ile3738Ile	ORF1ab	C>T
cluster 1	NC_045512.2	12043	C	T	hCoV-19/deer/USA/OH-OSU-2072/2021\B.1.617.2\Brown\U\2021-12-04	synonymous_variant	gaC/gaT	As926Asp	ORF1ab	C>T
cluster 1	NC_045512.2	12789	C	T	hCoV-19/deer/USA/OH-OSU-2072/2021\B.1.617.2\Brown\U\2021-12-04	missense_variant	aCa/aTa	Thr4175Ile	ORF1ab	C>T
cluster 1	NC_045512.2	13405	C	T	hCoV-19/deer/USA/OH-OSU-2072/2021\B.1.617.2\Brown\U\2021-12-04	synonymous_variant	ggC/ggT	Gly4380Gly	ORF1ab	C>T
cluster 1	NC_045512.2	16161	T	C	hCoV-19/deer/USA/OH-OSU-1292/2021\AY.39\Clermont\U\2021-11-06	synonymous_variant	ctT/ctC	Leu5299Leu	ORF1ab	T>C
cluster 1	NC_045512.2	16428	C	T	hCoV-19/deer/USA/OH-OSU-2072/2021\B.1.617.2\Brown\U\2021-12-04	synonymous_variant	taC/taT	Tyr5388Tyr	ORF1ab	C>T
cluster 1	NC_045512.2	17642	C	T	hCoV-19/deer/USA/OH-OSU-2072/2021\B.1.617.2\Brown\U\2021-12-04	missense_variant	gCt/gTt	Ala5793Val	ORF1ab	C>T
cluster 1	NC_045512.2	18252	C	T	hCoV-19/deer/USA/OH-OSU-2072/2021\B.1.617.2\Brown\U\2021-12-04	synonymous_variant	aaC/aaT	Asn5996Asn	ORF1ab	C>T
cluster 1	NC_045512.2	18379	G	T	hCoV-19/deer/USA/OH-OSU-1292/2021\AY.39\Clermont\U\2021-11-06	missense_variant	Ggt/Tgt	Gly6039Cys	ORF1ab	G>T
cluster 1	NC_045512.2	18747	C	T	hCoV-19/deer/USA/OH-OSU-2072/2021\B.1.617.2\Brown\U\2021-12-04	synonymous_variant	gtC/gtT	Val6161Val	ORF1ab	C>T
cluster 1	NC_045512.2	19891	G	T	hCoV-19/deer/USA/OH-OSU-2072/2021\B.1.617.2\Brown\U\2021-12-04	missense_variant	Gat/Tat	As543Tyr	ORF1ab	G>T
cluster 1	NC_045512.2	20389	C	T	NODE_0000490	missense_variant	Cgt/Tgt	Arg6709Cys	ORF1ab	C>T
cluster 1	NC_045512.2	21145	C	T	hCoV-19/deer/USA/OH-OSU-2072/2021\B.1.617.2\Brown\U\2021-12-04	missense_variant	Ctt/Ttt	Leu6961Phe	ORF1ab	C>T
cluster 1	NC_045512.2	21658	C	T	hCoV-19/deer/USA/OH-OSU-1292/2021\AY.39\Clermont\U\2021-11-06	synonymous_variant	ttC/ttT	Phe32Phe	S	C>T
cluster 1	NC_045512.2	25396	G	T	NODE_0000490	missense_variant	Gat/Tat	AsTyr	ORF3a	G>T
cluster 1	NC_045512.2	25420	A	T	hCoV-19/deer/USA/OH-OSU-2072/2021\B.1.617.2\Brown\U\2021-12-04	missense_variant	Att/Ttt	Ile10Phe	ORF3a	A>T
cluster 1	NC_045512.2	25463	C	T	hCoV-19/deer/USA/OH-OSU-2072/2021\B.1.617.2\Brown\U\2021-12-04	missense_variant	aCt/aTt	Thr24Ile	ORF3a	C>T
cluster 1	NC_045512.2	25469	T	C	hCoV-19/deer/USA/OH-OSU-2072/2021\B.1.617.2\Brown\U\2021-12-04	missense_variant	tTa/tCa	Leu26Ser	ORF3a	T>C
cluster 1	NC_045512.2	25702	C	T	hCoV-19/deer/USA/OH-OSU-2072/2021\B.1.617.2\Brown\U\2021-12-04	missense_variant	Cct/Tct	Pro104Ser	ORF3a	C>T
cluster 1	NC_045512.2	26679	T	A	hCoV-19/deer/USA/OH-OSU-1297/2021\B.1.617.2\Warren\U\2021-11-06	missense_variant	Ttc/Atc	Phe53Ile	M	T>A
cluster 1	NC_045512.2	28389	A	C	hCoV-19/deer/USA/OH-OSU-1292/2021\AY.39\Clermont\U\2021-11-06	missense_variant	cAa/cCa	Gln39Pro	N	A>C
cluster 1	NC_045512.2	28922	G	A	hCoV-19/deer/USA/OH-OSU-2072/2021\B.1.617.2\Brown\U\2021-12-04	missense_variant	Gct/Act	Ala217Thr	N	G>A
cluster 1	NC_045512.2	29668	C	T	NODE_0000490	synonymous_variant	ctC/ctT	Leu37Leu	ORF10	C>T
cluster 10	NC_045512.2	512	C	T	hCoV-19/deer/USA/OH-OSU-2111/2021\AY.25\Fairfield\U\2021-11-29	missense_variant	Cat/Tat	His83Tyr	ORF1ab	C>T
cluster 10	NC_045512.2	2644	C	T	NODE_0000174	synonymous_variant	atC/atT	Ile793Ile	ORF1ab	C>T
cluster 10	NC_045512.2	2969	A	G	hCoV-19/deer/USA/OH-OSU-2111/2021\AY.25\Fairfield\U\2021-11-29	missense_variant	Atg/Gtg	Met902Val	ORF1ab	A>G
cluster 10	NC_045512.2	3206	G	T	hCoV-19/deer/USA/OH-OSU-2125/2021\AY.25\Hocking\R\2021-11-29	missense_variant	Gat/Tat	As81Tyr	ORF1ab	G>T
cluster 10	NC_045512.2	3373	C	T	hCoV-19/deer/USA/OH-OSU-2111/2021\AY.25\Fairfield\U\2021-11-29	synonymous_variant	gaC/gaT	As036Asp	ORF1ab	C>T
cluster 10	NC_045512.2	5481	C	T	hCoV-19/deer/USA/OH-OSU-2125/2021\AY.25\Hocking\R\2021-11-29	missense_variant	gCc/gTc	Ala1739Val	ORF1ab	C>T
cluster 10	NC_045512.2	5770	C	T	hCoV-19/deer/USA/OH-OSU-2125/2021\AY.25\Hocking\R\2021-11-29	synonymous_variant	caC/caT	His1835His	ORF1ab	C>T
cluster 10	NC_045512.2	7113	C	T	hCoV-19/deer/USA/OH-OSU-2125/2021\AY.25\Hocking\R\2021-11-29	missense_variant	aCt/aTt	Thr2283Ile	ORF1ab	C>T
cluster 10	NC_045512.2	7303	C	T	hCoV-19/deer/USA/OH-OSU-2125/2021\AY.25\Hocking\R\2021-11-29	synonymous_variant	atC/atT	Ile2346Ile	ORF1ab	C>T
cluster 10	NC_045512.2	9347	A	G	hCoV-19/deer/USA/OH-OSU-2125/2021\AY.25\Hocking\R\2021-11-29	missense_variant	Act/Gct	Thr3028Ala	ORF1ab	A>G
cluster 10	NC_045512.2	9430	C	T	hCoV-19/deer/USA/OH-OSU-2125/2021\AY.25\Hocking\R\2021-11-29	synonymous_variant	atC/atT	Ile3055Ile	ORF1ab	C>T
cluster 10	NC_045512.2	12809	C	T	hCoV-19/deer/USA/OH-OSU-2125/2021\AY.25\Hocking\R\2021-11-29	missense_variant	Ctt/Ttt	Leu4182Phe	ORF1ab	C>T
cluster 10	NC_045512.2	14030	G	A	hCoV-19/deer/USA/OH-OSU-2125/2021\AY.25\Hocking\R\2021-11-29	missense_variant	cGa/cAa	Arg4589Gln	ORF1ab	G>A
cluster 10	NC_045512.2	14688	C	T	hCoV-19/deer/USA/OH-OSU-2125/2021\AY.25\Hocking\R\2021-11-29	synonymous_variant	aaC/aaT	Asn4808Asn	ORF1ab	C>T
cluster 10	NC_045512.2	15540	C	T	hCoV-19/deer/USA/OH-OSU-2125/2021\AY.25\Hocking\R\2021-11-29	synonymous_variant	gtC/gtT	Val5092Val	ORF1ab	C>T
cluster 10	NC_045512.2	16726	C	T	hCoV-19/deer/USA/OH-OSU-2125/2021\AY.25\Hocking\R\2021-11-29	missense_variant	Cat/Tat	His5488Tyr	ORF1ab	C>T
cluster 10	NC_045512.2	19554	C	A	NODE_0000174	synonymous_variant	ggC/ggA	Gly6430Gly	ORF1ab	C>A
cluster 10	NC_045512.2	20178	C	T	hCoV-19/deer/USA/OH-OSU-2125/2021\AY.25\Hocking\R\2021-11-29	synonymous_variant	gtC/gtT	Val6638Val	ORF1ab	C>T
cluster 10	NC_045512.2	20436	C	T	hCoV-19/deer/USA/OH-OSU-2125/2021\AY.25\Hocking\R\2021-11-29	synonymous_variant	gaC/gaT	As724Asp	ORF1ab	C>T
cluster 10	NC_045512.2	21648	C	T	hCoV-19/deer/USA/OH-OSU-2125/2021\AY.25\Hocking\R\2021-11-29	missense_variant	aCt/aTt	Thr29Ile	S	C>T
cluster 10	NC_045512.2	21772	C	T	hCoV-19/deer/USA/OH-OSU-2125/2021\AY.25\Hocking\R\2021-11-29	synonymous_variant	gtC/gtT	Val70Val	S	C>T
cluster 10	NC_045512.2	21997	C	T	hCoV-19/deer/USA/OH-OSU-2125/2021\AY.25\Hocking\R\2021-11-29	synonymous_variant	taC/taT	Tyr145Tyr	S	C>T
cluster 10	NC_045512.2	22954	T	A	hCoV-19/deer/USA/OH-OSU-2111/2021\AY.25\Fairfield\U\2021-11-29	missense_variant	ttT/ttA	Phe464Leu	S	T>A
cluster 10	NC_045512.2	23741	C	T	NODE_0000174	synonymous_variant	Cta/Tta	Leu727Leu	S	C>T
cluster 10	NC_045512.2	25006	C	T	hCoV-19/deer/USA/OH-OSU-2125/2021\AY.25\Hocking\R\2021-11-29	synonymous_variant	ttC/ttT	Phe1148Phe	S	C>T
cluster 10	NC_045512.2	27059	C	T	NODE_0000174	synonymous_variant	taC/taT	Tyr179Tyr	M	C>T
cluster 10	NC_045512.2	27610	C	T	hCoV-19/deer/USA/OH-OSU-2125/2021\AY.25\Hocking\R\2021-11-29	missense_variant	Cac/Tac	His73Tyr	ORF7a	C>T
cluster 10	NC_045512.2	28205	C	T	hCoV-19/deer/USA/OH-OSU-2125/2021\AY.25\Hocking\R\2021-11-29	synonymous_variant	ttC/ttT	Phe104Phe	ORF8	C>T
cluster 10	NC_045512.2	28603	C	T	NODE_0000174	synonymous_variant	ttC/ttT	Phe110Phe	N	C>T
cluster 10	NC_045512.2	28960	G	T	hCoV-19/deer/USA/OH-OSU-2125/2021\AY.25\Hocking\R\2021-11-29	missense_variant	caG/caT	Gln229His	N	G>T
cluster 10	NC_045512.2	29614	C	T	NODE_0000174	synonymous_variant	tgC/tgT	Cys19Cys	ORF10	C>T
cluster 11	NC_045512.2	2892	C	T	hCoV-19/deer/USA/OH-OSU-2222/2021\AY.25\Logan\R\2021-12-04	missense_variant	gCa/gTa	Ala876Val	ORF1ab	C>T
cluster 11	NC_045512.2	5578	G	A	hCoV-19/deer/USA/OH-OSU-1419/2021\AY.25\Champaign\R\2021-11-13	missense_variant	atG/atA	Met1771Ile	ORF1ab	G>A
cluster 11	NC_045512.2	6573	C	T	hCoV-19/deer/USA/OH-OSU-2222/2021\AY.25\Logan\R\2021-12-04	missense_variant	tCt/tTt	Ser2103Phe	ORF1ab	C>T
cluster 11	NC_045512.2	6606	C	T	hCoV-19/deer/USA/OH-OSU-2222/2021\AY.25\Logan\R\2021-12-04	missense_variant	tCt/tTt	Ser2114Phe	ORF1ab	C>T
cluster 11	NC_045512.2	6782	T	C	hCoV-19/deer/USA/OH-OSU-1434/2021\AY.25\Madison\U\2021-11-06	missense_variant	Ttt/Ctt	Phe2173Leu	ORF1ab	T>C
cluster 11	NC_045512.2	7029	C	T	hCoV-19/deer/USA/OH-OSU-1434/2021\AY.25\Madison\U\2021-11-06	missense_variant	tCt/tTt	Ser2255Phe	ORF1ab	C>T
cluster 11	NC_045512.2	7029	C	T	hCoV-19/deer/USA/OH-OSU-2222/2021\AY.25\Logan\R\2021-12-04	missense_variant	tCt/tTt	Ser2255Phe	ORF1ab	C>T
cluster 11	NC_045512.2	7086	C	T	NODE_0000178	missense_variant	aCt/aTt	Thr2274Ile	ORF1ab	C>T
cluster 11	NC_045512.2	7267	C	T	hCoV-19/deer/USA/OH-OSU-1429/2021\AY.25\Champaign\R\2021-11-13	synonymous_variant	ttC/ttT	Phe2334Phe	ORF1ab	C>T
cluster 11	NC_045512.2	7303	C	T	hCoV-19/deer/USA/OH-OSU-1434/2021\AY.25\Madison\U\2021-11-06	synonymous_variant	atC/atT	Ile2346Ile	ORF1ab	C>T
cluster 11	NC_045512.2	7303	C	T	NODE_0000179	synonymous_variant	atC/atT	Ile2346Ile	ORF1ab	C>T
cluster 11	NC_045512.2	8692	C	T	hCoV-19/deer/USA/OH-OSU-1434/2021\AY.25\Madison\U\2021-11-06	synonymous_variant	taC/taT	Tyr2809Tyr	ORF1ab	C>T
cluster 11	NC_045512.2	9303	C	T	hCoV-19/deer/USA/OH-OSU-1419/2021\AY.25\Champaign\R\2021-11-13	missense_variant	tCt/tTt	Ser3013Phe	ORF1ab	C>T
cluster 11	NC_045512.2	9319	C	T	hCoV-19/deer/USA/OH-OSU-1434/2021\AY.25\Madison\U\2021-11-06	synonymous_variant	ttC/ttT	Phe3018Phe	ORF1ab	C>T
cluster 11	NC_045512.2	9430	C	T	NODE_0000177	synonymous_variant	atC/atT	Ile3055Ile	ORF1ab	C>T
cluster 11	NC_045512.2	9559	C	T	hCoV-19/deer/USA/OH-OSU-1419/2021\AY.25\Champaign\R\2021-11-13	synonymous_variant	taC/taT	Tyr3098Tyr	ORF1ab	C>T
cluster 11	NC_045512.2	9979	C	T	hCoV-19/deer/USA/OH-OSU-2222/2021\AY.25\Logan\R\2021-12-04	synonymous_variant	ctC/ctT	Leu3238Leu	ORF1ab	C>T
cluster 11	NC_045512.2	10889	C	T	hCoV-19/deer/USA/OH-OSU-1434/2021\AY.25\Madison\U\2021-11-06	missense_variant	Cgt/Tgt	Arg3542Cys	ORF1ab	C>T
cluster 11	NC_045512.2	11152	C	T	hCoV-19/deer/USA/OH-OSU-2222/2021\AY.25\Logan\R\2021-12-04	synonymous_variant	gtC/gtT	Val3629Val	ORF1ab	C>T
cluster 11	NC_045512.2	11653	C	T	hCoV-19/deer/USA/OH-OSU-1434/2021\AY.25\Madison\U\2021-11-06	synonymous_variant	ctC/ctT	Leu3796Leu	ORF1ab	C>T
cluster 11	NC_045512.2	11868	C	T	NODE_0000179	missense_variant	aCa/aTa	Thr3868Ile	ORF1ab	C>T
cluster 11	NC_045512.2	12049	C	T	hCoV-19/deer/USA/OH-OSU-1434/2021\AY.25\Madison\U\2021-11-06	synonymous_variant	aaC/aaT	Asn3928Asn	ORF1ab	C>T
cluster 11	NC_045512.2	12596	C	T	hCoV-19/deer/USA/OH-OSU-2222/2021\AY.25\Logan\R\2021-12-04	missense_variant	Ctt/Ttt	Leu4111Phe	ORF1ab	C>T
cluster 11	NC_045512.2	13011	C	T	hCoV-19/deer/USA/OH-OSU-2222/2021\AY.25\Logan\R\2021-12-04	missense_variant	aCa/aTa	Thr4249Ile	ORF1ab	C>T
cluster 11	NC_045512.2	15441	C	T	hCoV-19/deer/USA/OH-OSU-1434/2021\AY.25\Madison\U\2021-11-06	synonymous_variant	gtC/gtT	Val5059Val	ORF1ab	C>T
cluster 11	NC_045512.2	16308	C	T	hCoV-19/deer/USA/OH-OSU-1434/2021\AY.25\Madison\U\2021-11-06	synonymous_variant	ttC/ttT	Phe5348Phe	ORF1ab	C>T
cluster 11	NC_045512.2	17676	C	T	hCoV-19/deer/USA/OH-OSU-2222/2021\AY.25\Logan\R\2021-12-04	synonymous_variant	atC/atT	Ile5804Ile	ORF1ab	C>T
cluster 11	NC_045512.2	18526	C	T	hCoV-19/deer/USA/OH-OSU-1434/2021\AY.25\Madison\U\2021-11-06	missense_variant	Cgt/Tgt	Arg6088Cys	ORF1ab	C>T
cluster 11	NC_045512.2	18828	C	T	hCoV-19/deer/USA/OH-OSU-1434/2021\AY.25\Madison\U\2021-11-06	synonymous_variant	gtC/gtT	Val6188Val	ORF1ab	C>T
cluster 11	NC_045512.2	19140	C	T	NODE_0000179	synonymous_variant	ttC/ttT	Phe6292Phe	ORF1ab	C>T
cluster 11	NC_045512.2	19961	C	T	hCoV-19/deer/USA/OH-OSU-1419/2021\AY.25\Champaign\R\2021-11-13	missense_variant	aCg/aTg	Thr6566Met	ORF1ab	C>T
cluster 11	NC_045512.2	21614	C	T	hCoV-19/deer/USA/OH-OSU-1434/2021\AY.25\Madison\U\2021-11-06	missense_variant	Ctt/Ttt	Leu18Phe	S	C>T
cluster 11	NC_045512.2	21772	C	T	hCoV-19/deer/USA/OH-OSU-1434/2021\AY.25\Madison\U\2021-11-06	synonymous_variant	gtC/gtT	Val70Val	S	C>T
cluster 11	NC_045512.2	25559	T	C	hCoV-19/deer/USA/OH-OSU-2222/2021\AY.25\Logan\R\2021-12-04	missense_variant	tTt/tCt	Phe56Ser	ORF3a	T>C
cluster 11	NC_045512.2	26735	C	T	hCoV-19/deer/USA/OH-OSU-2222/2021\AY.25\Logan\R\2021-12-04	synonymous_variant	taC/taT	Tyr71Tyr	M	C>T
cluster 11	NC_045512.2	27476	C	G	hCoV-19/deer/USA/OH-OSU-1434/2021\AY.25\Madison\U\2021-11-06	missense_variant	aCa/aGa	Thr28Arg	ORF7a	C>G
cluster 11	NC_045512.2	27613	G	A	hCoV-19/deer/USA/OH-OSU-1434/2021\AY.25\Madison\U\2021-11-06	missense_variant	Gtc/Atc	Val74Ile	ORF7a	G>A
cluster 11	NC_045512.2	27812	C	T	hCoV-19/deer/USA/OH-OSU-2222/2021\AY.25\Logan\R\2021-12-04	synonymous_variant	ttC/ttT	Phe19Phe	ORF7b	C>T
cluster 11	NC_045512.2	28016	C	T	hCoV-19/deer/USA/OH-OSU-2222/2021\AY.25\Logan\R\2021-12-04	synonymous_variant	ttC/ttT	Phe41Phe	ORF8	C>T
cluster 11	NC_045512.2	28022	T	C	hCoV-19/deer/USA/OH-OSU-1419/2021\AY.25\Champaign\R\2021-11-13	synonymous_variant	tcT/tcC	Ser43Ser	ORF8	T>C
cluster 11	NC_045512.2	28111	A	G	hCoV-19/deer/USA/OH-OSU-2222/2021\AY.25\Logan\R\2021-12-04	missense_variant	tAc/tGc	Tyr73Cys	ORF8	A>G
cluster 11	NC_045512.2	29668	C	T	hCoV-19/deer/USA/OH-OSU-2222/2021\AY.25\Logan\R\2021-12-04	synonymous_variant	ctC/ctT	Leu37Leu	ORF10	C>T
cluster 12	NC_045512.2	1263	C	T	NODE_0000156	missense_variant	aCg/aTg	Thr333Met	ORF1ab	C>T
cluster 12	NC_045512.2	3138	A	C	hCoV-19/deer/USA/OH-OSU-2184/2021\AY.25.1\Washington\U\2021-12-04	missense_variant	aAa/aCa	Lys958Thr	ORF1ab	A>C
cluster 12	NC_045512.2	4276	C	T	NODE_0000156	synonymous_variant	taC/taT	Tyr1337Tyr	ORF1ab	C>T
cluster 12	NC_045512.2	4768	T	C	NODE_0000156	synonymous_variant	ttT/ttC	Phe1501Phe	ORF1ab	T>C
cluster 12	NC_045512.2	4860	A	G	hCoV-19/deer/USA/OH-OSU-2184/2021\AY.25.1\Washington\U\2021-12-04	missense_variant	gAt/gGt	As532Gly	ORF1ab	A>G
cluster 12	NC_045512.2	7279	C	T	hCoV-19/deer/USA/OH-OSU-2306/2021\AY.25.1\Noble\R\2021-12-04	synonymous_variant	ttC/ttT	Phe2338Phe	ORF1ab	C>T
cluster 12	NC_045512.2	7626	A	G	NODE_0000156	missense_variant	aAt/aGt	Asn2454Ser	ORF1ab	A>G
cluster 12	NC_045512.2	9430	C	T	NODE_0000156	synonymous_variant	atC/atT	Ile3055Ile	ORF1ab	C>T
cluster 12	NC_045512.2	9448	C	T	NODE_0000156	synonymous_variant	gcC/gcT	Ala3061Ala	ORF1ab	C>T
cluster 12	NC_045512.2	11152	C	T	NODE_0000156	synonymous_variant	gtC/gtT	Val3629Val	ORF1ab	C>T
cluster 12	NC_045512.2	15654	C	T	NODE_0000156	synonymous_variant	gaC/gaT	As130Asp	ORF1ab	C>T
cluster 12	NC_045512.2	16993	T	C	hCoV-19/deer/USA/OH-OSU-2184/2021\AY.25.1\Washington\U\2021-12-04	missense_variant	Tac/Cac	Tyr5577His	ORF1ab	T>C
cluster 12	NC_045512.2	23248	C	T	hCoV-19/deer/USA/OH-OSU-2306/2021\AY.25.1\Noble\R\2021-12-04	synonymous_variant	ttC/ttT	Phe562Phe	S	C>T
cluster 12	NC_045512.2	23435	C	T	hCoV-19/deer/USA/OH-OSU-2306/2021\AY.25.1\Noble\R\2021-12-04	missense_variant	Cat/Tat	His625Tyr	S	C>T
cluster 12	NC_045512.2	25348	G	T	hCoV-19/deer/USA/OH-OSU-2306/2021\AY.25.1\Noble\R\2021-12-04	missense_variant	gaG/gaT	Glu1262Asp	S	G>T
cluster 12	NC_045512.2	26873	C	T	hCoV-19/deer/USA/OH-OSU-2306/2021\AY.25.1\Noble\R\2021-12-04	synonymous_variant	aaC/aaT	Asn117Asn	M	C>T
cluster 12	NC_045512.2	28930	T	C	NODE_0000156	synonymous_variant	ctT/ctC	Leu219Leu	N	T>C
cluster 13	NC_045512.2	6936	C	T	NODE_0000162	missense_variant	tCt/tTt	Ser2224Phe	ORF1ab	C>T
cluster 13	NC_045512.2	6990	C	T	NODE_0000160	missense_variant	tCt/tTt	Ser2242Phe	ORF1ab	C>T
cluster 13	NC_045512.2	7093	C	T	hCoV-19/deer/USA/OH-OSU-1114/2021\AY.25\Huron\R\2021-11-13	synonymous_variant	gtC/gtT	Val2276Val	ORF1ab	C>T
cluster 13	NC_045512.2	7113	C	T	hCoV-19/deer/USA/OH-OSU-1950/2021\AY.25\Huron\R\2021-11-29	missense_variant	aCt/aTt	Thr2283Ile	ORF1ab	C>T
cluster 13	NC_045512.2	7117	T	G	hCoV-19/deer/USA/OH-OSU-1099/2021\AY.25\Wyandot\R\2021-11-14	synonymous_variant	ggT/ggG	Gly2284Gly	ORF1ab	T>G
cluster 13	NC_045512.2	7303	C	T	hCoV-19/deer/USA/OH-OSU-2011/2021\AY.25\Crawford\R\2021-11-30	synonymous_variant	atC/atT	Ile2346Ile	ORF1ab	C>T
cluster 13	NC_045512.2	7318	C	T	hCoV-19/deer/USA/OH-OSU-1950/2021\AY.25\Huron\R\2021-11-29	synonymous_variant	ttC/ttT	Phe2351Phe	ORF1ab	C>T
cluster 13	NC_045512.2	7334	C	A	hCoV-19/deer/USA/OH-OSU-1106/2021\AY.25\Erie\2021-11-15	missense_variant	Cat/Aat	His2357Asn	ORF1ab	C>A
cluster 13	NC_045512.2	7334	C	T	hCoV-19/deer/USA/OH-OSU-2011/2021\AY.25\Crawford\R\2021-11-30	missense_variant	Cat/Tat	His2357Tyr	ORF1ab	C>T
cluster 13	NC_045512.2	7389	C	T	hCoV-19/deer/USA/OH-OSU-1950/2021\AY.25\Huron\R\2021-11-29	missense_variant	gCc/gTc	Ala2375Val	ORF1ab	C>T
cluster 13	NC_045512.2	7945	C	T	hCoV-19/deer/USA/OH-OSU-1106/2021\AY.25\Erie\2021-11-15	synonymous_variant	taC/taT	Tyr2560Tyr	ORF1ab	C>T
cluster 13	NC_045512.2	8025	C	T	NODE_0000159	missense_variant	gCa/gTa	Ala2587Val	ORF1ab	C>T
cluster 13	NC_045512.2	8251	C	T	hCoV-19/deer/USA/OH-OSU-1106/2021\AY.25\Erie\2021-11-15	synonymous_variant	gaC/gaT	As662Asp	ORF1ab	C>T
cluster 13	NC_045512.2	9430	C	T	hCoV-19/deer/USA/OH-OSU-1950/2021\AY.25\Huron\R\2021-11-29	synonymous_variant	atC/atT	Ile3055Ile	ORF1ab	C>T
cluster 13	NC_045512.2	9430	C	T	hCoV-19/deer/USA/OH-OSU-1111/2021\AY.25\Crawford\R\2021-11-22	synonymous_variant	atC/atT	Ile3055Ile	ORF1ab	C>T
cluster 13	NC_045512.2	11518	C	T	NODE_0000161	synonymous_variant	gtC/gtT	Val3751Val	ORF1ab	C>T
cluster 13	NC_045512.2	11575	C	T	hCoV-19/deer/USA/OH-OSU-1950/2021\AY.25\Huron\R\2021-11-29	synonymous_variant	ttC/ttT	Phe3770Phe	ORF1ab	C>T
cluster 13	NC_045512.2	12049	C	T	hCoV-19/deer/USA/OH-OSU-1106/2021\AY.25\Erie\2021-11-15	synonymous_variant	aaC/aaT	Asn3928Asn	ORF1ab	C>T
cluster 13	NC_045512.2	13241	T	C	hCoV-19/deer/USA/OH-OSU-1100/2021\AY.25\Wyandot\R\2021-11-14	missense_variant	Tgt/Cgt	Cys4326Arg	ORF1ab	T>C
cluster 13	NC_045512.2	14349	T	C	hCoV-19/deer/USA/OH-OSU-1099/2021\AY.25\Wyandot\R\2021-11-14	synonymous_variant	gaT/gaC	As695Asp	ORF1ab	T>C
cluster 13	NC_045512.2	15540	C	T	hCoV-19/deer/USA/OH-OSU-2011/2021\AY.25\Crawford\R\2021-11-30	synonymous_variant	gtC/gtT	Val5092Val	ORF1ab	C>T
cluster 13	NC_045512.2	15738	C	T	hCoV-19/deer/USA/OH-OSU-1114/2021\AY.25\Huron\R\2021-11-13	synonymous_variant	ttC/ttT	Phe5158Phe	ORF1ab	C>T
cluster 13	NC_045512.2	17358	T	C	hCoV-19/deer/USA/OH-OSU-1950/2021\AY.25\Huron\R\2021-11-29	synonymous_variant	gaT/gaC	As698Asp	ORF1ab	T>C
cluster 13	NC_045512.2	17580	T	A	hCoV-19/deer/USA/OH-OSU-1106/2021\AY.25\Erie\2021-11-15	synonymous_variant	atT/atA	Ile5772Ile	ORF1ab	T>A
cluster 13	NC_045512.2	18788	C	T	hCoV-19/deer/USA/OH-OSU-1106/2021\AY.25\Erie\2021-11-15	missense_variant	aCa/aTa	Thr6175Ile	ORF1ab	C>T
cluster 13	NC_045512.2	20055	A	G	hCoV-19/deer/USA/OH-OSU-2011/2021\AY.25\Crawford\R\2021-11-30	synonymous_variant	gaA/gaG	Glu6597Glu	ORF1ab	A>G
cluster 13	NC_045512.2	20060	G	T	hCoV-19/deer/USA/OH-OSU-1111/2021\AY.25\Crawford\R\2021-11-22	missense_variant	aGt/aTt	Ser6599Ile	ORF1ab	G>T
cluster 13	NC_045512.2	21614	C	T	NODE_0000160	missense_variant	Ctt/Ttt	Leu18Phe	S	C>T
cluster 13	NC_045512.2	23673	C	T	hCoV-19/deer/USA/OH-OSU-1114/2021\AY.25\Huron\R\2021-11-13	missense_variant	tCa/tTa	Ser704Leu	S	C>T
cluster 13	NC_045512.2	24138	C	T	hCoV-19/deer/USA/OH-OSU-1950/2021\AY.25\Huron\R\2021-11-29	missense_variant	aCt/aTt	Thr859Ile	S	C>T
cluster 13	NC_045512.2	24863	C	T	hCoV-19/deer/USA/OH-OSU-1100/2021\AY.25\Wyandot\R\2021-11-14	missense_variant	Cac/Tac	His1101Tyr	S	C>T
cluster 13	NC_045512.2	25006	C	T	hCoV-19/deer/USA/OH-OSU-1106/2021\AY.25\Erie\2021-11-15	synonymous_variant	ttC/ttT	Phe1148Phe	S	C>T
cluster 13	NC_045512.2	25482	C	T	hCoV-19/deer/USA/OH-OSU-2011/2021\AY.25\Crawford\R\2021-11-30	synonymous_variant	cgC/cgT	Arg30Arg	ORF3a	C>T
cluster 13	NC_045512.2	25934	A	T	NODE_0000159	missense_variant	gAa/gTa	Glu181Val	ORF3a	A>T
cluster 13	NC_045512.2	25934	T	A	hCoV-19/deer/USA/OH-OSU-1100/2021\AY.25\Wyandot\R\2021-11-14	missense_variant	gTa/gAa	Val181Glu	ORF3a	T>A
cluster 13	NC_045512.2	26299	C	T	hCoV-19/deer/USA/OH-OSU-1106/2021\AY.25\Erie\2021-11-15	missense_variant	Ctt/Ttt	Leu19Phe	E	C>T
cluster 13	NC_045512.2	26526	G	T	NODE_0000161	missense_variant	Gca/Tca	Ala2Ser	M	G>T
cluster 13	NC_045512.2	26903	T	C	hCoV-19/deer/USA/OH-OSU-1111/2021\AY.25\Crawford\R\2021-11-22	synonymous_variant	acT/acC	Thr127Thr	M	T>C
cluster 13	NC_045512.2	27509	C	T	NODE_0000159	missense_variant	aCa/aTa	Thr39Ile	ORF7a	C>T
cluster 13	NC_045512.2	27638	C	T	hCoV-19/deer/USA/OH-OSU-1950/2021\AY.25\Huron\R\2021-11-29	missense_variant	gCt/gTt	Ala82Val	ORF7a	C>T
cluster 13	NC_045512.2	28725	C	T	hCoV-19/deer/USA/OH-OSU-1106/2021\AY.25\Erie\2021-11-15	missense_variant	cCt/cTt	Pro151Leu	N	C>T
cluster 13	NC_045512.2	28754	C	T	hCoV-19/deer/USA/OH-OSU-1111/2021\AY.25\Crawford\R\2021-11-22	missense_variant	Ctt/Ttt	Leu161Phe	N	C>T
cluster 13	NC_045512.2	29160	C	T	hCoV-19/deer/USA/OH-OSU-2011/2021\AY.25\Crawford\R\2021-11-30	missense_variant	aCt/aTt	Thr296Ile	N	C>T
cluster 13	NC_045512.2	29195	G	T	NODE_0000159	missense_variant	Gcc/Tcc	Ala308Ser	N	G>T
cluster 14	NC_045512.2	924	A	C	NODE_0000167	missense_variant	gAc/gCc	As20Ala	ORF1ab	A>C
cluster 14	NC_045512.2	2594	C	T	NODE_0000168	missense_variant	Cca/Tca	Pro777Ser	ORF1ab	C>T
cluster 14	NC_045512.2	3429	C	T	hCoV-19/deer/USA/OH-OSU-1206/2021\AY.25\Summit\U\2021-11-13	missense_variant	aCa/aTa	Thr1055Ile	ORF1ab	C>T
cluster 14	NC_045512.2	7267	C	T	NODE_0000167	synonymous_variant	ttC/ttT	Phe2334Phe	ORF1ab	C>T
cluster 14	NC_045512.2	7303	C	T	NODE_0000168	synonymous_variant	atC/atT	Ile2346Ile	ORF1ab	C>T
cluster 14	NC_045512.2	9967	C	T	NODE_0000167	synonymous_variant	ctC/ctT	Leu3234Leu	ORF1ab	C>T
cluster 14	NC_045512.2	10720	A	G	NODE_0000167	synonymous_variant	cgA/cgG	Arg3485Arg	ORF1ab	A>G
cluster 14	NC_045512.2	11333	G	T	NODE_0000167	missense_variant	Gtg/Ttg	Val3690Leu	ORF1ab	G>T
cluster 14	NC_045512.2	18747	C	T	NODE_0000168	synonymous_variant	gtC/gtT	Val6161Val	ORF1ab	C>T
cluster 14	NC_045512.2	20259	C	T	NODE_0000167	synonymous_variant	ttC/ttT	Phe6665Phe	ORF1ab	C>T
cluster 14	NC_045512.2	20543	C	T	hCoV-19/deer/USA/OH-OSU-2323/2021\AY.25\Medina\U\2021-12-04	missense_variant	tCc/tTc	Ser6760Phe	ORF1ab	C>T
cluster 14	NC_045512.2	21637	C	A	NODE_0000167	synonymous_variant	ccC/ccA	Pro25Pro	S	C>A
cluster 14	NC_045512.2	24904	C	T	NODE_0000167	synonymous_variant	atC/atT	Ile1114Ile	S	C>T
cluster 14	NC_045512.2	25624	C	T	hCoV-19/deer/USA/OH-OSU-1206/2021\AY.25\Summit\U\2021-11-13	missense_variant	Cac/Tac	His78Tyr	ORF3a	C>T
cluster 14	NC_045512.2	25855	G	T	NODE_0000167	missense_variant	Gac/Tac	As55Tyr	ORF3a	G>T
cluster 14	NC_045512.2	27706	G	T	NODE_0000168	missense_variant	Gcg/Tcg	Ala105Ser	ORF7a	G>T
cluster 14	NC_045512.2	28606	C	T	NODE_0000167	synonymous_variant	taC/taT	Tyr111Tyr	N	C>T
cluster 14	NC_045512.2	29668	C	T	NODE_0000167	synonymous_variant	ctC/ctT	Leu37Leu	ORF10	C>T
cluster 2	NC_045512.2	1879	A	G	NODE_0000445	synonymous_variant	tcA/tcG	Ser538Ser	ORF1ab	A>G
cluster 2	NC_045512.2	3264	C	T	hCoV-19/deer/USA/OH-OSU-1734/2021\AY.103\Miami\U\2021-12-04	missense_variant	aCt/aTt	Thr1000Ile	ORF1ab	C>T
cluster 2	NC_045512.2	4540	C	T	hCoV-19/deer/USA/OH-OSU-1710/2021\AY.103\Miami\U\2021-12-04	synonymous_variant	taC/taT	Tyr1425Tyr	ORF1ab	C>T
cluster 2	NC_045512.2	4543	C	T	hCoV-19/deer/USA/OH-OSU-1734/2021\AY.103\Miami\U\2021-12-04	synonymous_variant	acC/acT	Thr1426Thr	ORF1ab	C>T
cluster 2	NC_045512.2	5907	C	A	hCoV-19/deer/USA/OH-OSU-1710/2021\AY.103\Miami\U\2021-12-04	missense_variant	aCt/aAt	Thr1881Asn	ORF1ab	C>A
cluster 2	NC_045512.2	6573	C	T	NODE_0000445	missense_variant	tCt/tTt	Ser2103Phe	ORF1ab	C>T
cluster 2	NC_045512.2	7303	C	T	hCoV-19/deer/USA/OH-OSU-1710/2021\AY.103\Miami\U\2021-12-04	synonymous_variant	atC/atT	Ile2346Ile	ORF1ab	C>T
cluster 2	NC_045512.2	9286	C	T	hCoV-19/deer/USA/OH-OSU-1710/2021\AY.103\Miami\U\2021-12-04	synonymous_variant	aaC/aaT	Asn3007Asn	ORF1ab	C>T
cluster 2	NC_045512.2	9430	C	T	hCoV-19/deer/USA/OH-OSU-1734/2021\AY.103\Miami\U\2021-12-04	synonymous_variant	atC/atT	Ile3055Ile	ORF1ab	C>T
cluster 2	NC_045512.2	9561	C	T	hCoV-19/deer/USA/OH-OSU-1710/2021\AY.103\Miami\U\2021-12-04	missense_variant	tCa/tTa	Ser3099Leu	ORF1ab	C>T
cluster 2	NC_045512.2	9565	C	T	hCoV-19/deer/USA/OH-OSU-1710/2021\AY.103\Miami\U\2021-12-04	synonymous_variant	ttC/ttT	Phe3100Phe	ORF1ab	C>T
cluster 2	NC_045512.2	10778	C	T	hCoV-19/deer/USA/OH-OSU-1734/2021\AY.103\Miami\U\2021-12-04	synonymous_variant	Cta/Tta	Leu3505Leu	ORF1ab	C>T
cluster 2	NC_045512.2	11003	C	T	hCoV-19/deer/USA/OH-OSU-1710/2021\AY.103\Miami\U\2021-12-04	missense_variant	Cac/Tac	His3580Tyr	ORF1ab	C>T
cluster 2	NC_045512.2	12115	C	T	hCoV-19/deer/USA/OH-OSU-1710/2021\AY.103\Miami\U\2021-12-04	synonymous_variant	tcC/tcT	Ser3950Ser	ORF1ab	C>T
cluster 2	NC_045512.2	12484	C	T	hCoV-19/deer/USA/OH-OSU-1710/2021\AY.103\Miami\U\2021-12-04	synonymous_variant	gtC/gtT	Val4073Val	ORF1ab	C>T
cluster 2	NC_045512.2	13138	C	T	hCoV-19/deer/USA/OH-OSU-1734/2021\AY.103\Miami\U\2021-12-04	synonymous_variant	atC/atT	Ile4291Ile	ORF1ab	C>T
cluster 2	NC_045512.2	13694	C	T	hCoV-19/deer/USA/OH-OSU-1734/2021\AY.103\Miami\U\2021-12-04	missense_variant	aCa/aTa	Thr4477Ile	ORF1ab	C>T
cluster 2	NC_045512.2	16952	C	T	hCoV-19/deer/USA/OH-OSU-1710/2021\AY.103\Miami\U\2021-12-04	missense_variant	aCa/aTa	Thr5563Ile	ORF1ab	C>T
cluster 2	NC_045512.2	17850	C	T	hCoV-19/deer/USA/OH-OSU-1734/2021\AY.103\Miami\U\2021-12-04	synonymous_variant	ggC/ggT	Gly5862Gly	ORF1ab	C>T
cluster 2	NC_045512.2	18504	A	G	hCoV-19/deer/USA/OH-OSU-1734/2021\AY.103\Miami\U\2021-12-04	synonymous_variant	aaA/aaG	Lys6080Lys	ORF1ab	A>G
cluster 2	NC_045512.2	18814	C	T	hCoV-19/deer/USA/OH-OSU-1734/2021\AY.103\Miami\U\2021-12-04	synonymous_variant	Ctg/Ttg	Leu6184Leu	ORF1ab	C>T
cluster 2	NC_045512.2	19610	C	T	hCoV-19/deer/USA/OH-OSU-1710/2021\AY.103\Miami\U\2021-12-04	missense_variant	aCa/aTa	Thr6449Ile	ORF1ab	C>T
cluster 2	NC_045512.2	20354	T	C	NODE_0000445	missense_variant	tTa/tCa	Leu6697Ser	ORF1ab	T>C
cluster 2	NC_045512.2	20759	C	T	hCoV-19/deer/USA/OH-OSU-1710/2021\AY.103\Miami\U\2021-12-04	missense_variant	gCa/gTa	Ala6832Val	ORF1ab	C>T
cluster 2	NC_045512.2	21614	C	T	hCoV-19/deer/USA/OH-OSU-1734/2021\AY.103\Miami\U\2021-12-04	missense_variant	Ctt/Ttt	Leu18Phe	S	C>T
cluster 2	NC_045512.2	21660	C	T	hCoV-19/deer/USA/OH-OSU-1710/2021\AY.103\Miami\U\2021-12-04	missense_variant	aCa/aTa	Thr33Ile	S	C>T
cluster 2	NC_045512.2	21767	C	T	hCoV-19/deer/USA/OH-OSU-1734/2021\AY.103\Miami\U\2021-12-04	missense_variant	Cat/Tat	His69Tyr	S	C>T
cluster 2	NC_045512.2	23595	C	T	hCoV-19/deer/USA/OH-OSU-1710/2021\AY.103\Miami\U\2021-12-04	missense_variant	aCt/aTt	Thr678Ile	S	C>T
cluster 2	NC_045512.2	27509	C	T	hCoV-19/deer/USA/OH-OSU-1710/2021\AY.103\Miami\U\2021-12-04	missense_variant	aCa/aTa	Thr39Ile	ORF7a	C>T
cluster 2	NC_045512.2	27578	A	T	hCoV-19/deer/USA/OH-OSU-1734/2021\AY.103\Miami\U\2021-12-04	missense_variant	cAa/cTa	Gln62Leu	ORF7a	A>T
cluster 2	NC_045512.2	28432	C	T	hCoV-19/deer/USA/OH-OSU-1710/2021\AY.103\Miami\U\2021-12-04	synonymous_variant	ttC/ttT	Phe53Phe	N	C>T
cluster 2	NC_045512.2	29296	C	T	hCoV-19/deer/USA/OH-OSU-1734/2021\AY.103\Miami\U\2021-12-04	synonymous_variant	gaC/gaT	As41Asp	N	C>T
cluster 3	NC_045512.2	7113	C	T	hCoV-19/deer/USA/OH-OSU-1243/2021\AY.103\Harrison\R\2021-11-13	missense_variant	aCt/aTt	Thr2283Ile	ORF1ab	C>T
cluster 3	NC_045512.2	8090	C	T	NODE_0000455	missense_variant	Ctc/Ttc	Leu2609Phe	ORF1ab	C>T
cluster 3	NC_045512.2	9430	C	T	NODE_0000455	synonymous_variant	atC/atT	Ile3055Ile	ORF1ab	C>T
cluster 3	NC_045512.2	9438	C	T	NODE_0000457	missense_variant	aCa/aTa	Thr3058Ile	ORF1ab	C>T
cluster 3	NC_045512.2	13119	C	T	hCoV-19/deer/USA/OH-OSU-1243/2021\AY.103\Harrison\R\2021-11-13	missense_variant	gCt/gTt	Ala4285Val	ORF1ab	C>T
cluster 3	NC_045512.2	14649	C	T	NODE_0000457	synonymous_variant	aaC/aaT	Asn4795Asn	ORF1ab	C>T
cluster 3	NC_045512.2	17012	C	T	hCoV-19/deer/USA/OH-OSU-2249/2021\AY.103\Harrison\R\2021-12-04	missense_variant	tCa/tTa	Ser5583Leu	ORF1ab	C>T
cluster 3	NC_045512.2	20259	C	T	hCoV-19/deer/USA/OH-OSU-1243/2021\AY.103\Harrison\R\2021-11-13	synonymous_variant	ttC/ttT	Phe6665Phe	ORF1ab	C>T
cluster 3	NC_045512.2	20762	C	T	hCoV-19/deer/USA/OH-OSU-1243/2021\AY.103\Harrison\R\2021-11-13	missense_variant	aCa/aTa	Thr6833Ile	ORF1ab	C>T
cluster 3	NC_045512.2	21178	C	T	hCoV-19/deer/USA/OH-OSU-2249/2021\AY.103\Harrison\R\2021-12-04	missense_variant	Cat/Tat	His6972Tyr	ORF1ab	C>T
cluster 3	NC_045512.2	21516	C	T	NODE_0000455	synonymous_variant	aaC/aaT	Asn7084Asn	ORF1ab	C>T
cluster 3	NC_045512.2	21614	C	T	NODE_0000455	missense_variant	Ctt/Ttt	Leu18Phe	S	C>T
cluster 3	NC_045512.2	21676	C	T	hCoV-19/deer/USA/OH-OSU-2249/2021\AY.103\Harrison\R\2021-12-04	synonymous_variant	taC/taT	Tyr38Tyr	S	C>T
cluster 3	NC_045512.2	22329	C	T	NODE_0000455	missense_variant	tCa/tTa	Ser256Leu	S	C>T
cluster 3	NC_045512.2	22717	T	C	NODE_0000455	synonymous_variant	acT/acC	Thr385Thr	S	T>C
cluster 3	NC_045512.2	22747	C	T	NODE_0000457	synonymous_variant	gtC/gtT	Val395Val	S	C>T
cluster 3	NC_045512.2	23604	G	A	hCoV-19/deer/USA/OH-OSU-0716/2022\AY.103\Summit\U\2022-01-20	missense_variant	cGt/cAt	Ala681His	S	G>A
cluster 3	NC_045512.2	24098	G	T	hCoV-19/deer/USA/OH-OSU-2249/2021\AY.103\Harrison\R\2021-12-04	missense_variant	Gct/Tct	Ala846Ser	S	G>T
cluster 3	NC_045512.2	24378	C	T	NODE_0000455	missense_variant	tCt/tTt	Ser939Phe	S	C>T
cluster 3	NC_045512.2	25176	A	G	hCoV-19/deer/USA/OH-OSU-0716/2022\AY.103\Summit\U\2022-01-20	missense_variant	aAg/aGg	Lys1205Arg	S	A>G
cluster 3	NC_045512.2	27632	G	T	NODE_0000456	missense_variant	aGa/aTa	Arg80Ile	ORF7a	G>T
cluster 3	NC_045512.2	28810	C	T	hCoV-19/deer/USA/OH-OSU-2249/2021\AY.103\Harrison\R\2021-12-04	synonymous_variant	ggC/ggT	Gly179Gly	N	C>T
cluster 3	NC_045512.2	28818	C	A	NODE_0000456	missense_variant	gCc/gAc	Ala182Asp	N	C>A
cluster 3	NC_045512.2	28818	A	C	hCoV-19/deer/USA/OH-OSU-0716/2022\AY.103\Summit\U\2022-01-20	missense_variant	gAc/gCc	As82Ala	N	A>C
cluster 3	NC_045512.2	29402	T	G	hCoV-19/deer/USA/OH-OSU-0716/2022\AY.103\Summit\U\2022-01-20	missense_variant	Tat/Gat	Tyr377Asp	N	T>G
cluster 3	NC_045512.2	29635	C	T	NODE_0000457	synonymous_variant	taC/taT	Tyr26Tyr	ORF10	C>T
cluster 4	NC_045512.2	384	C	T	hCoV-19/deer/USA/OH-OSU-2070/2021\AY.103\Brown\U\2021-12-04	missense_variant	tCa/tTa	Ser40Leu	ORF1ab	C>T
cluster 4	NC_045512.2	1931	C	A	hCoV-19/deer/USA/OH-OSU-2070/2021\AY.103\Brown\U\2021-12-04	missense_variant	Caa/Aaa	Gln556Lys	ORF1ab	C>A
cluster 4	NC_045512.2	2485	C	T	hCoV-19/deer/USA/OH-OSU-2070/2021\AY.103\Brown\U\2021-12-04	synonymous_variant	atC/atT	Ile740Ile	ORF1ab	C>T
cluster 4	NC_045512.2	3924	C	T	NODE_0000244	missense_variant	cCt/cTt	Pro1220Leu	ORF1ab	C>T
cluster 4	NC_045512.2	6317	C	T	NODE_0000244	missense_variant	Cca/Tca	Pro2018Ser	ORF1ab	C>T
cluster 4	NC_045512.2	6936	C	T	NODE_0000244	missense_variant	tCt/tTt	Ser2224Phe	ORF1ab	C>T
cluster 4	NC_045512.2	6945	T	C	hCoV-19/deer/USA/OH-OSU-2070/2021\AY.103\Brown\U\2021-12-04	missense_variant	aTa/aCa	Ile2227Thr	ORF1ab	T>C
cluster 4	NC_045512.2	7303	C	T	NODE_0000244	synonymous_variant	atC/atT	Ile2346Ile	ORF1ab	C>T
cluster 4	NC_045512.2	7393	G	A	hCoV-19/deer/USA/OH-OSU-2088/2021\AY.103\Brown\U\2021-11-30	synonymous_variant	ccG/ccA	Pro2376Pro	ORF1ab	G>A
cluster 4	NC_045512.2	7860	C	A	hCoV-19/deer/USA/OH-OSU-2088/2021\AY.103\Brown\U\2021-11-30	missense_variant	aCt/aAt	Thr2532Asn	ORF1ab	C>A
cluster 4	NC_045512.2	9430	C	T	hCoV-19/deer/USA/OH-OSU-2088/2021\AY.103\Brown\U\2021-11-30	synonymous_variant	atC/atT	Ile3055Ile	ORF1ab	C>T
cluster 4	NC_045512.2	9711	C	T	hCoV-19/deer/USA/OH-OSU-2070/2021\AY.103\Brown\U\2021-12-04	missense_variant	tCc/tTc	Ser3149Phe	ORF1ab	C>T
cluster 4	NC_045512.2	10868	C	T	hCoV-19/deer/USA/OH-OSU-2070/2021\AY.103\Brown\U\2021-12-04	synonymous_variant	Ctg/Ttg	Leu3535Leu	ORF1ab	C>T
cluster 4	NC_045512.2	11620	C	T	hCoV-19/deer/USA/OH-OSU-2070/2021\AY.103\Brown\U\2021-12-04	synonymous_variant	ttC/ttT	Phe3785Phe	ORF1ab	C>T
cluster 4	NC_045512.2	11962	C	T	hCoV-19/deer/USA/OH-OSU-2070/2021\AY.103\Brown\U\2021-12-04	synonymous_variant	ctC/ctT	Leu3899Leu	ORF1ab	C>T
cluster 4	NC_045512.2	12049	C	T	hCoV-19/deer/USA/OH-OSU-2070/2021\AY.103\Brown\U\2021-12-04	synonymous_variant	aaC/aaT	Asn3928Asn	ORF1ab	C>T
cluster 4	NC_045512.2	12073	C	T	hCoV-19/deer/USA/OH-OSU-2070/2021\AY.103\Brown\U\2021-12-04	synonymous_variant	gaC/gaT	As936Asp	ORF1ab	C>T
cluster 4	NC_045512.2	14799	T	G	hCoV-19/deer/USA/OH-OSU-2070/2021\AY.103\Brown\U\2021-12-04	possible_stop_gained	taT/taG	Tyr4845*	ORF1ab	T>G
cluster 4	NC_045512.2	18329	C	T	NODE_0000244	missense_variant	aCt/aTt	Thr6022Ile	ORF1ab	C>T
cluster 4	NC_045512.2	18501	C	T	hCoV-19/deer/USA/OH-OSU-2088/2021\AY.103\Brown\U\2021-11-30	synonymous_variant	taC/taT	Tyr6079Tyr	ORF1ab	C>T
cluster 4	NC_045512.2	18744	C	T	NODE_0000244	synonymous_variant	taC/taT	Tyr6160Tyr	ORF1ab	C>T
cluster 4	NC_045512.2	19554	C	T	NODE_0000244	synonymous_variant	ggC/ggT	Gly6430Gly	ORF1ab	C>T
cluster 4	NC_045512.2	20703	C	T	hCoV-19/deer/USA/OH-OSU-2088/2021\AY.103\Brown\U\2021-11-30	synonymous_variant	taC/taT	Tyr6813Tyr	ORF1ab	C>T
cluster 4	NC_045512.2	20946	C	T	hCoV-19/deer/USA/OH-OSU-2070/2021\AY.103\Brown\U\2021-12-04	synonymous_variant	gtC/gtT	Val6894Val	ORF1ab	C>T
cluster 4	NC_045512.2	21786	G	T	NODE_0000244	missense_variant	gGt/gTt	Gly75Val	S	G>T
cluster 4	NC_045512.2	21995	T	G	hCoV-19/deer/USA/OH-OSU-2088/2021\AY.103\Brown\U\2021-11-30	missense_variant	Tac/Gac	Tyr145Asp	S	T>G
cluster 4	NC_045512.2	22427	G	A	hCoV-19/deer/USA/OH-OSU-2070/2021\AY.103\Brown\U\2021-12-04	missense_variant	Gta/Ata	Val289Ile	S	G>A
cluster 4	NC_045512.2	22988	G	A	hCoV-19/deer/USA/OH-OSU-2070/2021\AY.103\Brown\U\2021-12-04	missense_variant	Ggt/Agt	Gly476Ser	S	G>A
cluster 4	NC_045512.2	25273	G	T	hCoV-19/deer/USA/OH-OSU-2070/2021\AY.103\Brown\U\2021-12-04	missense_variant	atG/atT	Met1237Ile	S	G>T
cluster 4	NC_045512.2	25728	C	T	hCoV-19/deer/USA/OH-OSU-2088/2021\AY.103\Brown\U\2021-11-30	synonymous_variant	gtC/gtT	Val112Val	ORF3a	C>T
cluster 4	NC_045512.2	26781	C	T	NODE_0000244	missense_variant	Ctt/Ttt	Leu87Phe	M	C>T
cluster 4	NC_045512.2	27689	C	T	NODE_0000244	missense_variant	cCa/cTa	Pro99Leu	ORF7a	C>T
cluster 4	NC_045512.2	29296	C	T	hCoV-19/deer/USA/OH-OSU-2070/2021\AY.103\Brown\U\2021-12-04	synonymous_variant	gaC/gaT	As41Asp	N	C>T
cluster 4	NC_045512.2	29358	C	T	NODE_0000244	missense_variant	aCa/aTa	Thr362Ile	N	C>T
cluster 5	NC_045512.2	2195	G	T	hCoV-19/deer/USA/OH-OSU-2083/2021\AY.103\Clermont\U\2021-11-30	missense_variant	Gac/Tac	As44Tyr	ORF1ab	G>T
cluster 5	NC_045512.2	5581	C	T	hCoV-19/deer/USA/OH-OSU-2084/2021\AY.103\Clermont\U\2021-11-30	synonymous_variant	ggC/ggT	Gly1772Gly	ORF1ab	C>T
cluster 5	NC_045512.2	6238	T	C	NODE_0000215	synonymous_variant	gtT/gtC	Val1991Val	ORF1ab	T>C
cluster 5	NC_045512.2	6936	C	T	NODE_0000215	missense_variant	tCt/tTt	Ser2224Phe	ORF1ab	C>T
cluster 5	NC_045512.2	7011	C	T	hCoV-19/deer/USA/OH-OSU-2084/2021\AY.103\Clermont\U\2021-11-30	missense_variant	gCt/gTt	Ala2249Val	ORF1ab	C>T
cluster 5	NC_045512.2	7303	C	T	NODE_0000215	synonymous_variant	atC/atT	Ile2346Ile	ORF1ab	C>T
cluster 5	NC_045512.2	7318	C	T	NODE_0000215	synonymous_variant	ttC/ttT	Phe2351Phe	ORF1ab	C>T
cluster 5	NC_045512.2	7360	G	T	hCoV-19/deer/USA/OH-OSU-2083/2021\AY.103\Clermont\U\2021-11-30	missense_variant	atG/atT	Met2365Ile	ORF1ab	G>T
cluster 5	NC_045512.2	9430	C	T	NODE_0000215	synonymous_variant	atC/atT	Ile3055Ile	ORF1ab	C>T
cluster 5	NC_045512.2	9559	C	T	NODE_0000215	synonymous_variant	taC/taT	Tyr3098Tyr	ORF1ab	C>T
cluster 5	NC_045512.2	9810	C	T	hCoV-19/deer/USA/OH-OSU-2084/2021\AY.103\Clermont\U\2021-11-30	missense_variant	aCc/aTc	Thr3182Ile	ORF1ab	C>T
cluster 5	NC_045512.2	11620	C	T	NODE_0000215	synonymous_variant	ttC/ttT	Phe3785Phe	ORF1ab	C>T
cluster 5	NC_045512.2	14718	G	A	NODE_0000215	synonymous_variant	aaG/aaA	Lys4818Lys	ORF1ab	G>A
cluster 5	NC_045512.2	17502	C	T	hCoV-19/deer/USA/OH-OSU-2084/2021\AY.103\Clermont\U\2021-11-30	synonymous_variant	ttC/ttT	Phe5746Phe	ORF1ab	C>T
cluster 5	NC_045512.2	18559	C	T	NODE_0000215	missense_variant	Ctt/Ttt	Leu6099Phe	ORF1ab	C>T
cluster 5	NC_045512.2	18747	C	T	NODE_0000215	synonymous_variant	gtC/gtT	Val6161Val	ORF1ab	C>T
cluster 5	NC_045512.2	19956	T	C	hCoV-19/deer/USA/OH-OSU-2084/2021\AY.103\Clermont\U\2021-11-30	synonymous_variant	acT/acC	Thr6564Thr	ORF1ab	T>C
cluster 5	NC_045512.2	21459	C	T	hCoV-19/deer/USA/OH-OSU-2083/2021\AY.103\Clermont\U\2021-11-30	synonymous_variant	atC/atT	Ile7065Ile	ORF1ab	C>T
cluster 5	NC_045512.2	21549	C	T	NODE_0000215	synonymous_variant	aaC/aaT	Asn7095Asn	ORF1ab	C>T
cluster 5	NC_045512.2	22011	A	T	hCoV-19/deer/USA/OH-OSU-2084/2021\AY.103\Clermont\U\2021-11-30	missense_variant	aAa/aTa	Lys150Ile	S	A>T
cluster 5	NC_045512.2	22332	G	A	NODE_0000215	missense_variant	gGt/gAt	Gly257Asp	S	G>A
cluster 5	NC_045512.2	23757	C	T	NODE_0000215	missense_variant	aCc/aTc	Thr732Ile	S	C>T
cluster 5	NC_045512.2	25639	T	G	NODE_0000215	missense_variant	Ttg/Gtg	Leu83Val	ORF3a	T>G
cluster 5	NC_045512.2	27012	C	T	NODE_0000215	synonymous_variant	Ctg/Ttg	Leu164Leu	M	C>T
cluster 5	NC_045512.2	28054	C	T	NODE_0000215	missense_variant	tCa/tTa	Ser54Leu	ORF8	C>T
cluster 5	NC_045512.2	28321	G	A	NODE_0000215	synonymous_variant	acG/acA	Thr16Thr	N	G>A
cluster 6	NC_045512.2	1912	C	T	NODE_0000192	synonymous_variant	tcC/tcT	Ser549Ser	ORF1ab	C>T
cluster 6	NC_045512.2	3411	C	T	NODE_0000192	missense_variant	gCt/gTt	Ala1049Val	ORF1ab	C>T
cluster 6	NC_045512.2	4195	T	C	NODE_0000192	synonymous_variant	acT/acC	Thr1310Thr	ORF1ab	T>C
cluster 6	NC_045512.2	5826	C	T	NODE_0000194	missense_variant	aCa/aTa	Thr1854Ile	ORF1ab	C>T
cluster 6	NC_045512.2	6366	A	G	hCoV-19/deer/USA/OH-OSU-2326/2021\AY.103\Lucas\U\2021-12-07	missense_variant	cAg/cGg	Gln2034Arg	ORF1ab	A>G
cluster 6	NC_045512.2	6616	A	G	hCoV-19/deer/USA/OH-OSU-2327/2021\AY.103\Lucas\U\2021-12-07	synonymous_variant	ttA/ttG	Leu2117Leu	ORF1ab	A>G
cluster 6	NC_045512.2	7083	C	T	NODE_0000192	missense_variant	tCt/tTt	Ser2273Phe	ORF1ab	C>T
cluster 6	NC_045512.2	7376	C	T	NODE_0000192	missense_variant	Ctt/Ttt	Leu2371Phe	ORF1ab	C>T
cluster 6	NC_045512.2	8344	C	T	NODE_0000192	synonymous_variant	gaC/gaT	As693Asp	ORF1ab	C>T
cluster 6	NC_045512.2	9430	C	T	NODE_0000193	synonymous_variant	atC/atT	Ile3055Ile	ORF1ab	C>T
cluster 6	NC_045512.2	9451	C	T	NODE_0000194	synonymous_variant	taC/taT	Tyr3062Tyr	ORF1ab	C>T
cluster 6	NC_045512.2	9532	C	T	hCoV-19/deer/USA/OH-OSU-2327/2021\AY.103\Lucas\U\2021-12-07	synonymous_variant	ttC/ttT	Phe3089Phe	ORF1ab	C>T
cluster 6	NC_045512.2	11050	C	T	hCoV-19/deer/USA/OH-OSU-2326/2021\AY.103\Lucas\U\2021-12-07	synonymous_variant	gtC/gtT	Val3595Val	ORF1ab	C>T
cluster 6	NC_045512.2	11653	C	T	NODE_0000192	synonymous_variant	ctC/ctT	Leu3796Leu	ORF1ab	C>T
cluster 6	NC_045512.2	11824	C	T	NODE_0000192	synonymous_variant	atC/atT	Ile3853Ile	ORF1ab	C>T
cluster 6	NC_045512.2	12073	C	T	hCoV-19/deer/USA/OH-OSU-2327/2021\AY.103\Lucas\U\2021-12-07	synonymous_variant	gaC/gaT	As936Asp	ORF1ab	C>T
cluster 6	NC_045512.2	12747	C	T	NODE_0000192	missense_variant	aCt/aTt	Thr4161Ile	ORF1ab	C>T
cluster 6	NC_045512.2	12789	C	T	NODE_0000193	missense_variant	aCa/aTa	Thr4175Ile	ORF1ab	C>T
cluster 6	NC_045512.2	13019	C	T	hCoV-19/deer/USA/OH-OSU-2326/2021\AY.103\Lucas\U\2021-12-07	synonymous_variant	Cta/Tta	Leu4252Leu	ORF1ab	C>T
cluster 6	NC_045512.2	13517	C	T	NODE_0000192	missense_variant	aCt/aTt	Thr4418Ile	ORF1ab	C>T
cluster 6	NC_045512.2	13552	T	C	hCoV-19/deer/USA/OH-OSU-2327/2021\AY.103\Lucas\U\2021-12-07	missense_variant	Tac/Cac	Tyr4430His	ORF1ab	T>C
cluster 6	NC_045512.2	14053	C	T	NODE_0000192	synonymous_variant	Ctg/Ttg	Leu4597Leu	ORF1ab	C>T
cluster 6	NC_045512.2	14184	C	T	NODE_0000192	synonymous_variant	acC/acT	Thr4640Thr	ORF1ab	C>T
cluster 6	NC_045512.2	15126	C	T	NODE_0000194	synonymous_variant	atC/atT	Ile4954Ile	ORF1ab	C>T
cluster 6	NC_045512.2	20480	C	T	hCoV-19/deer/USA/OH-OSU-2326/2021\AY.103\Lucas\U\2021-12-07	missense_variant	tCa/tTa	Ser6739Leu	ORF1ab	C>T
cluster 6	NC_045512.2	20783	T	C	NODE_0000192	missense_variant	aTg/aCg	Met6840Thr	ORF1ab	T>C
cluster 6	NC_045512.2	21459	C	T	NODE_0000193	synonymous_variant	atC/atT	Ile7065Ile	ORF1ab	C>T
cluster 6	NC_045512.2	21595	C	T	NODE_0000192	synonymous_variant	gtC/gtT	Val11Val	S	C>T
cluster 6	NC_045512.2	22480	C	T	hCoV-19/deer/USA/OH-OSU-2327/2021\AY.103\Lucas\U\2021-12-07	synonymous_variant	ttC/ttT	Phe306Phe	S	C>T
cluster 6	NC_045512.2	23601	C	T	NODE_0000192	missense_variant	tCt/tTt	Ser680Phe	S	C>T
cluster 6	NC_045512.2	23757	C	T	NODE_0000194	missense_variant	aCc/aTc	Thr732Ile	S	C>T
cluster 6	NC_045512.2	24847	T	C	hCoV-19/deer/USA/OH-OSU-2327/2021\AY.103\Lucas\U\2021-12-07	synonymous_variant	ttT/ttC	Phe1095Phe	S	T>C
cluster 6	NC_045512.2	24849	T	C	hCoV-19/deer/USA/OH-OSU-2327/2021\AY.103\Lucas\U\2021-12-07	missense_variant	gTt/gCt	Val1096Ala	S	T>C
cluster 6	NC_045512.2	24914	G	C	NODE_0000194	missense_variant	Gac/Cac	As118His	S	G>C
cluster 6	NC_045512.2	25126	G	T	NODE_0000192	missense_variant	gaG/gaT	Glu1188Asp	S	G>T
cluster 6	NC_045512.2	25680	C	T	hCoV-19/deer/USA/OH-OSU-2327/2021\AY.103\Lucas\U\2021-12-07	synonymous_variant	ctC/ctT	Leu96Leu	ORF3a	C>T
cluster 6	NC_045512.2	28320	C	T	hCoV-19/deer/USA/OH-OSU-2158/2021\AY.103\Lucas\U\2021-12-07	missense_variant	aCg/aTg	Thr16Met	N	C>T
cluster 6	NC_045512.2	28712	G	A	hCoV-19/deer/USA/OH-OSU-2327/2021\AY.103\Lucas\U\2021-12-07	missense_variant	Ggc/Agc	Gly147Ser	N	G>A
cluster 6	NC_045512.2	28826	C	T	NODE_0000192	missense_variant	Cgt/Tgt	Arg185Cys	N	C>T
cluster 6	NC_045512.2	28888	T	C	NODE_0000192	synonymous_variant	acT/acC	Thr205Thr	N	T>C
cluster 6	NC_045512.2	29315	G	A	NODE_0000195	missense_variant	Gat/Aat	As48Asn	N	G>A
cluster 6	NC_045512.2	29627	C	T	hCoV-19/deer/USA/OH-OSU-2326/2021\AY.103\Lucas\U\2021-12-07	missense_variant	Cgt/Tgt	Arg24Cys	ORF10	C>T
cluster 6	NC_045512.2	29659	C	T	hCoV-19/deer/USA/OH-OSU-2327/2021\AY.103\Lucas\U\2021-12-07	synonymous_variant	aaC/aaT	Asn34Asn	ORF10	C>T
cluster 6	NC_045512.2	29666	C	T	NODE_0000194	missense_variant	Ctc/Ttc	Leu37Phe	ORF10	C>T
cluster 7	NC_045512.2	991	G	T	NODE_0000269	synonymous_variant	acG/acT	Thr242Thr	ORF1ab	G>T
cluster 7	NC_045512.2	1667	A	G	hCoV-19/deer/USA/OH-OSU-1271/2021\AY.103\Clermont\U\2021-11-06	missense_variant	Aaa/Gaa	Lys468Glu	ORF1ab	A>G
cluster 7	NC_045512.2	3176	C	T	hCoV-19/deer/USA/OH-OSU-1271/2021\AY.103\Clermont\U\2021-11-06	missense_variant	Cct/Tct	Pro971Ser	ORF1ab	C>T
cluster 7	NC_045512.2	3674	A	T	hCoV-19/deer/USA/OH-OSU-2069/2021\AY.103\Warren\U\2021-12-04	missense_variant	Aat/Tat	Asn1137Tyr	ORF1ab	A>T
cluster 7	NC_045512.2	4183	T	C	hCoV-19/deer/USA/OH-OSU-1271/2021\AY.103\Clermont\U\2021-11-06	synonymous_variant	gcT/gcC	Ala1306Ala	ORF1ab	T>C
cluster 7	NC_045512.2	5008	G	T	NODE_0000269	synonymous_variant	acG/acT	Thr1581Thr	ORF1ab	G>T
cluster 7	NC_045512.2	5986	C	T	hCoV-19/deer/USA/OH-OSU-2069/2021\AY.103\Warren\U\2021-12-04	synonymous_variant	ttC/ttT	Phe1907Phe	ORF1ab	C>T
cluster 7	NC_045512.2	7124	T	C	hCoV-19/deer/USA/OH-OSU-2069/2021\AY.103\Warren\U\2021-12-04	missense_variant	Tct/Cct	Ser2287Pro	ORF1ab	T>C
cluster 7	NC_045512.2	9053	T	G	hCoV-19/deer/USA/OH-OSU-2069/2021\AY.103\Warren\U\2021-12-04	missense_variant	Tta/Gta	Leu2930Val	ORF1ab	T>G
cluster 7	NC_045512.2	10765	C	T	hCoV-19/deer/USA/OH-OSU-2069/2021\AY.103\Warren\U\2021-12-04	synonymous_variant	taC/taT	Tyr3500Tyr	ORF1ab	C>T
cluster 7	NC_045512.2	11339	C	T	NODE_0000269	synonymous_variant	Cta/Tta	Leu3692Leu	ORF1ab	C>T
cluster 7	NC_045512.2	11575	C	T	hCoV-19/deer/USA/OH-OSU-1271/2021\AY.103\Clermont\U\2021-11-06	synonymous_variant	ttC/ttT	Phe3770Phe	ORF1ab	C>T
cluster 7	NC_045512.2	11587	T	C	hCoV-19/deer/USA/OH-OSU-2069/2021\AY.103\Warren\U\2021-12-04	synonymous_variant	aaT/aaC	Asn3774Asn	ORF1ab	T>C
cluster 7	NC_045512.2	11620	C	T	hCoV-19/deer/USA/OH-OSU-2069/2021\AY.103\Warren\U\2021-12-04	synonymous_variant	ttC/ttT	Phe3785Phe	ORF1ab	C>T
cluster 7	NC_045512.2	15714	C	T	hCoV-19/deer/USA/OH-OSU-1271/2021\AY.103\Clermont\U\2021-11-06	synonymous_variant	ctC/ctT	Leu5150Leu	ORF1ab	C>T
cluster 7	NC_045512.2	21137	A	G	hCoV-19/deer/USA/OH-OSU-2069/2021\AY.103\Warren\U\2021-12-04	missense_variant	aAg/aGg	Lys6958Arg	ORF1ab	A>G
cluster 7	NC_045512.2	21396	C	T	hCoV-19/deer/USA/OH-OSU-2069/2021\AY.103\Warren\U\2021-12-04	synonymous_variant	gaC/gaT	As044Asp	ORF1ab	C>T
cluster 7	NC_045512.2	21614	C	T	hCoV-19/deer/USA/OH-OSU-2069/2021\AY.103\Warren\U\2021-12-04	missense_variant	Ctt/Ttt	Leu18Phe	S	C>T
cluster 7	NC_045512.2	25587	C	G	NODE_0000269	synonymous_variant	ctC/ctG	Leu65Leu	ORF3a	C>G
cluster 7	NC_045512.2	25810	C	T	hCoV-19/deer/USA/OH-OSU-2069/2021\AY.103\Warren\U\2021-12-04	missense_variant	Ctt/Ttt	Leu140Phe	ORF3a	C>T
cluster 7	NC_045512.2	26152	G	T	hCoV-19/deer/USA/OH-OSU-1271/2021\AY.103\Clermont\U\2021-11-06	possible_stop_gained	Gga/Tga	Gly254*	ORF3a	G>T
cluster 7	NC_045512.2	27998	C	A	hCoV-19/deer/USA/OH-OSU-1271/2021\AY.103\Clermont\U\2021-11-06	missense_variant	gaC/gaA	As5Glu	ORF8	C>A
cluster 8	NC_045512.2	1997	C	T	NODE_0000362	synonymous_variant	Ctg/Ttg	Leu578Leu	ORF1ab	C>T
cluster 8	NC_045512.2	2706	C	T	hCoV-19/deer/USA/OH-OSU-2105/2021\AY.103\Fairfield\U\2021-11-29	missense_variant	aCa/aTa	Thr814Ile	ORF1ab	C>T
cluster 8	NC_045512.2	5422	T	C	NODE_0000362	synonymous_variant	aaT/aaC	Asn1719Asn	ORF1ab	T>C
cluster 8	NC_045512.2	7303	C	T	hCoV-19/deer/USA/OH-OSU-2126/2021\AY.103\Fairfield\U\2021-11-29	synonymous_variant	atC/atT	Ile2346Ile	ORF1ab	C>T
cluster 8	NC_045512.2	7639	C	T	hCoV-19/deer/USA/OH-OSU-2126/2021\AY.103\Fairfield\U\2021-11-29	synonymous_variant	ttC/ttT	Phe2458Phe	ORF1ab	C>T
cluster 8	NC_045512.2	8605	C	A	NODE_0000362	missense_variant	ttC/ttA	Phe2780Leu	ORF1ab	C>A
cluster 8	NC_045512.2	9430	C	T	NODE_0000362	synonymous_variant	atC/atT	Ile3055Ile	ORF1ab	C>T
cluster 8	NC_045512.2	10450	C	T	NODE_0000362	synonymous_variant	ccC/ccT	Pro3395Pro	ORF1ab	C>T
cluster 8	NC_045512.2	11195	C	T	hCoV-19/deer/USA/OH-OSU-2126/2021\AY.103\Fairfield\U\2021-11-29	missense_variant	Ctt/Ttt	Leu3644Phe	ORF1ab	C>T
cluster 8	NC_045512.2	11449	T	C	NODE_0000362	synonymous_variant	gaT/gaC	As728Asp	ORF1ab	T>C
cluster 8	NC_045512.2	12885	C	T	NODE_0000362	missense_variant	aCa/aTa	Thr4207Ile	ORF1ab	C>T
cluster 8	NC_045512.2	13066	A	G	NODE_0000362	synonymous_variant	ttA/ttG	Leu4267Leu	ORF1ab	A>G
cluster 8	NC_045512.2	16853	G	T	NODE_0000362	missense_variant	gGt/gTt	Gly5530Val	ORF1ab	G>T
cluster 8	NC_045512.2	18744	C	T	hCoV-19/deer/USA/OH-OSU-2105/2021\AY.103\Fairfield\U\2021-11-29	synonymous_variant	taC/taT	Tyr6160Tyr	ORF1ab	C>T
cluster 8	NC_045512.2	19610	C	T	NODE_0000362	missense_variant	aCa/aTa	Thr6449Ile	ORF1ab	C>T
cluster 8	NC_045512.2	21614	C	T	hCoV-19/deer/USA/OH-OSU-2105/2021\AY.103\Fairfield\U\2021-11-29	missense_variant	Ctt/Ttt	Leu18Phe	S	C>T
cluster 8	NC_045512.2	23063	A	T	NODE_0000362	missense_variant	Aat/Tat	Asn501Tyr	S	A>T
cluster 8	NC_045512.2	25271	A	G	NODE_0000362	missense_variant	Atg/Gtg	Met1237Val	S	A>G
cluster 8	NC_045512.2	25416	C	T	hCoV-19/deer/USA/OH-OSU-2126/2021\AY.103\Fairfield\U\2021-11-29	synonymous_variant	ttC/ttT	Phe8Phe	ORF3a	C>T
cluster 8	NC_045512.2	25831	C	T	hCoV-19/deer/USA/OH-OSU-2126/2021\AY.103\Fairfield\U\2021-11-29	missense_variant	Ctt/Ttt	Leu147Phe	ORF3a	C>T
cluster 9	NC_045512.2	1230	A	G	NODE_0000107	missense_variant	aAg/aGg	Lys322Arg	ORF1ab	A>G
cluster 9	NC_045512.2	1912	C	T	NODE_0000108	synonymous_variant	tcC/tcT	Ser549Ser	ORF1ab	C>T
cluster 9	NC_045512.2	6402	T	C	hCoV-19/deer/USA/OH-OSU-1793/2021\AY.44\Athens\R\2021-11-07	missense_variant	cTa/cCa	Leu2046Pro	ORF1ab	T>C
cluster 9	NC_045512.2	6562	T	C	NODE_0000107	synonymous_variant	taT/taC	Tyr2099Tyr	ORF1ab	T>C
cluster 9	NC_045512.2	6633	C	T	hCoV-19/deer/USA/OH-OSU-1828/2021\AY.44\Athens\R\2021-11-30	missense_variant	gCt/gTt	Ala2123Val	ORF1ab	C>T
cluster 9	NC_045512.2	7303	C	T	NODE_0000107	synonymous_variant	atC/atT	Ile2346Ile	ORF1ab	C>T
cluster 9	NC_045512.2	7945	C	T	NODE_0000107	synonymous_variant	taC/taT	Tyr2560Tyr	ORF1ab	C>T
cluster 9	NC_045512.2	9430	C	T	NODE_0000107	synonymous_variant	atC/atT	Ile3055Ile	ORF1ab	C>T
cluster 9	NC_045512.2	9611	C	T	hCoV-19/deer/USA/OH-OSU-1830/2021\AY.44\Athens\R\2021-11-30	missense_variant	Ctt/Ttt	Leu3116Phe	ORF1ab	C>T
cluster 9	NC_045512.2	9700	C	T	hCoV-19/deer/USA/OH-OSU-1842/2021\AY.44\Washington\U\2021-11-30	synonymous_variant	atC/atT	Ile3145Ile	ORF1ab	C>T
cluster 9	NC_045512.2	11575	C	T	NODE_0000110	synonymous_variant	ttC/ttT	Phe3770Phe	ORF1ab	C>T
cluster 9	NC_045512.2	12073	C	T	hCoV-19/deer/USA/OH-OSU-1793/2021\AY.44\Athens\R\2021-11-07	synonymous_variant	gaC/gaT	As936Asp	ORF1ab	C>T
cluster 9	NC_045512.2	14313	T	C	hCoV-19/deer/USA/OH-OSU-1842/2021\AY.44\Washington\U\2021-11-30	synonymous_variant	gaT/gaC	As683Asp	ORF1ab	T>C
cluster 9	NC_045512.2	18255	G	T	hCoV-19/deer/USA/OH-OSU-1833/2021\AY.44\Athens\R\2021-11-30	missense_variant	atG/atT	Met5997Ile	ORF1ab	G>T
cluster 9	NC_045512.2	19117	G	T	NODE_0000110	missense_variant	Gct/Tct	Ala6285Ser	ORF1ab	G>T
cluster 9	NC_045512.2	19220	T	C	hCoV-19/deer/USA/OH-OSU-1793/2021\AY.44\Athens\R\2021-11-07	missense_variant	gTt/gCt	Val6319Ala	ORF1ab	T>C
cluster 9	NC_045512.2	19269	C	T	hCoV-19/deer/USA/OH-OSU-1793/2021\AY.44\Athens\R\2021-11-07	synonymous_variant	aaC/aaT	Asn6335Asn	ORF1ab	C>T
cluster 9	NC_045512.2	20102	G	T	NODE_0000108	missense_variant	aGt/aTt	Ser6613Ile	ORF1ab	G>T
cluster 9	NC_045512.2	20451	C	T	NODE_0000109	synonymous_variant	aaC/aaT	Asn6729Asn	ORF1ab	C>T
cluster 9	NC_045512.2	21595	C	T	NODE_0000109	synonymous_variant	gtC/gtT	Val11Val	S	C>T
cluster 9	NC_045512.2	21658	C	T	NODE_0000109	synonymous_variant	ttC/ttT	Phe32Phe	S	C>T
cluster 9	NC_045512.2	21724	G	A	hCoV-19/deer/USA/OH-OSU-1830/2021\AY.44\Athens\R\2021-11-30	synonymous_variant	ttG/ttA	Leu54Leu	S	G>A
cluster 9	NC_045512.2	21767	C	T	hCoV-19/deer/USA/OH-OSU-1703/2021\AY.44\Athens\R\2021-11-30	missense_variant	Cat/Tat	His69Tyr	S	C>T
cluster 9	NC_045512.2	22636	C	T	NODE_0000109	synonymous_variant	atC/atT	Ile358Ile	S	C>T
cluster 9	NC_045512.2	23063	A	T	hCoV-19/deer/USA/OH-OSU-1793/2021\AY.44\Athens\R\2021-11-07	missense_variant	Aat/Tat	Asn501Tyr	S	A>T
cluster 9	NC_045512.2	23142	C	T	hCoV-19/deer/USA/OH-OSU-1833/2021\AY.44\Athens\R\2021-11-30	missense_variant	cCt/cTt	Pro527Leu	S	C>T
cluster 9	NC_045512.2	24193	G	A	NODE_0000109	synonymous_variant	ctG/ctA	Leu877Leu	S	G>A
cluster 9	NC_045512.2	24588	C	T	NODE_0000110	missense_variant	aCt/aTt	Thr1009Ile	S	C>T
cluster 9	NC_045512.2	25686	T	G	hCoV-19/deer/USA/OH-OSU-1842/2021\AY.44\Washington\U\2021-11-30	synonymous_variant	gcT/gcG	Ala98Ala	ORF3a	T>G
cluster 9	NC_045512.2	25720	G	C	hCoV-19/deer/USA/OH-OSU-1842/2021\AY.44\Washington\U\2021-11-30	missense_variant	Gct/Cct	Ala110Pro	ORF3a	G>C
cluster 9	NC_045512.2	26196	G	T	hCoV-19/deer/USA/OH-OSU-1793/2021\AY.44\Athens\R\2021-11-07	synonymous_variant	acG/acT	Thr268Thr	ORF3a	G>T
cluster 9	NC_045512.2	26735	C	T	hCoV-19/deer/USA/OH-OSU-1830/2021\AY.44\Athens\R\2021-11-30	synonymous_variant	taC/taT	Tyr71Tyr	M	C>T
cluster 9	NC_045512.2	26735	C	T	hCoV-19/deer/USA/OH-OSU-1703/2021\AY.44\Athens\R\2021-11-30	synonymous_variant	taC/taT	Tyr71Tyr	M	C>T
cluster 9	NC_045512.2	27035	T	C	NODE_0000107	synonymous_variant	gcT/gcC	Ala171Ala	M	T>C
cluster 9	NC_045512.2	27131	C	T	NODE_0000107	synonymous_variant	aaC/aaT	Asn203Asn	M	C>T
cluster 9	NC_045512.2	27526	C	T	hCoV-19/deer/USA/OH-OSU-1842/2021\AY.44\Washington\U\2021-11-30	missense_variant	Cca/Tca	Pro45Ser	ORF7a	C>T
cluster 9	NC_045512.2	27536	C	T	hCoV-19/deer/USA/OH-OSU-1703/2021\AY.44\Athens\R\2021-11-30	missense_variant	cCt/cTt	Pro48Leu	ORF7a	C>T
cluster 9	NC_045512.2	28107	C	T	NODE_0000109	stop_gained	Cag/Tag	Gln72*	ORF8	C>T
cluster 9	NC_045512.2	28146	C	T	hCoV-19/deer/USA/OH-OSU-1842/2021\AY.44\Washington\U\2021-11-30	missense_variant	Cct/Tct	Pro85Ser	ORF8	C>T
cluster 9	NC_045512.2	28333	C	A	hCoV-19/deer/USA/OH-OSU-1703/2021\AY.44\Athens\R\2021-11-30	synonymous_variant	ccC/ccA	Pro20Pro	N	C>A
cluster 9	NC_045512.2	28792	A	T	NODE_0000107	synonymous_variant	gcA/gcT	Ala173Ala	N	A>T
cluster 9	NC_045512.2	29050	G	A	hCoV-19/deer/USA/OH-OSU-1833/2021\AY.44\Athens\R\2021-11-30	synonymous_variant	cgG/cgA	Arg259Arg	N	G>A
cluster 9	NC_045512.2	29619	T	A	NODE_0000109	missense_variant	aTg/aAg	Met21Lys	ORF10	T>A
cluster 9	NC_045512.2	29666	C	T	NODE_0000107	missense_variant	Ctc/Ttc	Leu37Phe	ORF10	C>T

## Sheet: Alpha
Cluster	Ref	Pos	Before	After	Node	MutType	Codon	ProtChange	gene	Change
NODE_0000050	NC_045512.2	2564	G	A	hCoV-19/deer/USA/OH-OSU-1331/2021\B.1.1.7\Brown\U\2021-11-13	missense_variant	Gaa/Aaa	Glu767Lys	ORF1ab	G>A
NODE_0000050	NC_045512.2	2706	C	T	NODE_0000051	missense_variant	aCa/aTa	Thr814Ile	ORF1ab	C>T
NODE_0000050	NC_045512.2	3736	C	T	hCoV-19/deer/USA/OH-OSU-1335/2021\B.1.1.7\Brown\U\2021-11-13	synonymous_variant	gaC/gaT	As157Asp	ORF1ab	C>T
NODE_0000050	NC_045512.2	4113	C	T	NODE_0000051	missense_variant	gCt/gTt	Ala1283Val	ORF1ab	C>T
NODE_0000050	NC_045512.2	7303	C	T	NODE_0000051	synonymous_variant	atC/atT	Ile2346Ile	ORF1ab	C>T
NODE_0000050	NC_045512.2	7318	C	T	NODE_0000051	synonymous_variant	ttC/ttT	Phe2351Phe	ORF1ab	C>T
NODE_0000050	NC_045512.2	7318	T	C	hCoV-19/deer/USA/OH-OSU-1331/2021\B.1.1.7\Brown\U\2021-11-13	synonymous_variant	ttT/ttC	Phe2351Phe	ORF1ab	T>C
NODE_0000050	NC_045512.2	7334	C	T	hCoV-19/deer/USA/OH-OSU-2153/2021\B.1.1.7\Meigs\R\2021-12-04	missense_variant	Cat/Tat	His2357Tyr	ORF1ab	C>T
NODE_0000050	NC_045512.2	7334	C	T	hCoV-19/deer/USA/OH-OSU-1335/2021\B.1.1.7\Brown\U\2021-11-13	missense_variant	Cat/Tat	His2357Tyr	ORF1ab	C>T
NODE_0000050	NC_045512.2	7423	C	T	hCoV-19/deer/USA/OH-OSU-1338/2021\B.1.1.7\Brown\U\2021-11-13	synonymous_variant	ttC/ttT	Phe2386Phe	ORF1ab	C>T
NODE_0000050	NC_045512.2	9430	C	T	NODE_0000051	synonymous_variant	atC/atT	Ile3055Ile	ORF1ab	C>T
NODE_0000050	NC_045512.2	9487	C	T	NODE_0000051	synonymous_variant	taC/taT	Tyr3074Tyr	ORF1ab	C>T
NODE_0000050	NC_045512.2	9532	C	T	NODE_0000053	synonymous_variant	ttC/ttT	Phe3089Phe	ORF1ab	C>T
NODE_0000050	NC_045512.2	9611	C	T	NODE_0000052	missense_variant	Ctt/Ttt	Leu3116Phe	ORF1ab	C>T
NODE_0000050	NC_045512.2	9615	C	T	hCoV-19/deer/USA/OH-OSU-2153/2021\B.1.1.7\Meigs\R\2021-12-04	missense_variant	aCt/aTt	Thr3117Ile	ORF1ab	C>T
NODE_0000050	NC_045512.2	9679	C	T	NODE_0000052	synonymous_variant	ttC/ttT	Phe3138Phe	ORF1ab	C>T
NODE_0000050	NC_045512.2	9836	C	T	hCoV-19/deer/USA/OH-OSU-1338/2021\B.1.1.7\Brown\U\2021-11-13	synonymous_variant	Cta/Tta	Leu3191Leu	ORF1ab	C>T
NODE_0000050	NC_045512.2	10450	C	T	hCoV-19/deer/USA/OH-OSU-2153/2021\B.1.1.7\Meigs\R\2021-12-04	synonymous_variant	ccC/ccT	Pro3395Pro	ORF1ab	C>T
NODE_0000050	NC_045512.2	10450	C	T	hCoV-19/deer/USA/OH-OSU-1335/2021\B.1.1.7\Brown\U\2021-11-13	synonymous_variant	ccC/ccT	Pro3395Pro	ORF1ab	C>T
NODE_0000050	NC_045512.2	10868	C	T	hCoV-19/deer/USA/OH-OSU-1338/2021\B.1.1.7\Brown\U\2021-11-13	synonymous_variant	Ctg/Ttg	Leu3535Leu	ORF1ab	C>T
NODE_0000050	NC_045512.2	11152	C	T	hCoV-19/deer/USA/OH-OSU-1335/2021\B.1.1.7\Brown\U\2021-11-13	synonymous_variant	gtC/gtT	Val3629Val	ORF1ab	C>T
NODE_0000050	NC_045512.2	12049	C	T	NODE_0000051	synonymous_variant	aaC/aaT	Asn3928Asn	ORF1ab	C>T
NODE_0000050	NC_045512.2	12073	C	T	NODE_0000051	synonymous_variant	gaC/gaT	As936Asp	ORF1ab	C>T
NODE_0000050	NC_045512.2	12789	C	T	hCoV-19/deer/USA/OH-OSU-1331/2021\B.1.1.7\Brown\U\2021-11-13	missense_variant	aCa/aTa	Thr4175Ile	ORF1ab	C>T
NODE_0000050	NC_045512.2	13320	T	C	hCoV-19/deer/USA/OH-OSU-2153/2021\B.1.1.7\Meigs\R\2021-12-04	missense_variant	aTa/aCa	Ile4352Thr	ORF1ab	T>C
NODE_0000050	NC_045512.2	13554	C	T	hCoV-19/deer/USA/OH-OSU-2153/2021\B.1.1.7\Meigs\R\2021-12-04	synonymous_variant	taC/taT	Tyr4430Tyr	ORF1ab	C>T
NODE_0000050	NC_045512.2	13554	C	T	hCoV-19/deer/USA/OH-OSU-1335/2021\B.1.1.7\Brown\U\2021-11-13	synonymous_variant	taC/taT	Tyr4430Tyr	ORF1ab	C>T
NODE_0000050	NC_045512.2	14014	T	G	hCoV-19/deer/USA/OH-OSU-2153/2021\B.1.1.7\Meigs\R\2021-12-04	missense_variant	Ttc/Gtc	Phe4584Val	ORF1ab	T>G
NODE_0000050	NC_045512.2	15126	C	T	hCoV-19/deer/USA/OH-OSU-1335/2021\B.1.1.7\Brown\U\2021-11-13	synonymous_variant	atC/atT	Ile4954Ile	ORF1ab	C>T
NODE_0000050	NC_045512.2	15279	T	C	hCoV-19/deer/USA/OH-OSU-2153/2021\B.1.1.7\Meigs\R\2021-12-04	synonymous_variant	caT/caC	His5005His	ORF1ab	T>C
NODE_0000050	NC_045512.2	15738	C	T	hCoV-19/deer/USA/OH-OSU-1331/2021\B.1.1.7\Brown\U\2021-11-13	synonymous_variant	ttC/ttT	Phe5158Phe	ORF1ab	C>T
NODE_0000050	NC_045512.2	16537	G	A	hCoV-19/deer/USA/OH-OSU-2153/2021\B.1.1.7\Meigs\R\2021-12-04	missense_variant	Gat/Aat	As425Asn	ORF1ab	G>A
NODE_0000050	NC_045512.2	16537	G	A	hCoV-19/deer/USA/OH-OSU-1335/2021\B.1.1.7\Brown\U\2021-11-13	missense_variant	Gat/Aat	As425Asn	ORF1ab	G>A
NODE_0000050	NC_045512.2	16843	G	T	NODE_0000052	missense_variant	Ggt/Tgt	Gly5527Cys	ORF1ab	G>T
NODE_0000050	NC_045512.2	18570	C	T	NODE_0000052	synonymous_variant	ctC/ctT	Leu6102Leu	ORF1ab	C>T
NODE_0000050	NC_045512.2	18647	C	T	NODE_0000052	missense_variant	cCt/cTt	Pro6128Leu	ORF1ab	C>T
NODE_0000050	NC_045512.2	19983	C	T	NODE_0000052	synonymous_variant	gtC/gtT	Val6573Val	ORF1ab	C>T
NODE_0000050	NC_045512.2	21145	C	T	NODE_0000051	missense_variant	Ctt/Ttt	Leu6961Phe	ORF1ab	C>T
NODE_0000050	NC_045512.2	21570	T	G	hCoV-19/deer/USA/OH-OSU-1338/2021\B.1.1.7\Brown\U\2021-11-13	missense_variant	gTt/gGt	Val3Gly	S	T>G
NODE_0000050	NC_045512.2	23766	T	C	hCoV-19/deer/USA/OH-OSU-1331/2021\B.1.1.7\Brown\U\2021-11-13	missense_variant	tTa/tCa	Leu735Ser	S	T>C
NODE_0000050	NC_045512.2	23766	C	T	NODE_0000051	missense_variant	tCa/tTa	Ser735Leu	S	C>T
NODE_0000050	NC_045512.2	25463	C	T	NODE_0000051	missense_variant	aCt/aTt	Thr24Ile	ORF3a	C>T
NODE_0000050	NC_045512.2	25688	C	T	hCoV-19/deer/USA/OH-OSU-1331/2021\B.1.1.7\Brown\U\2021-11-13	missense_variant	gCt/gTt	Ala99Val	ORF3a	C>T
NODE_0000050	NC_045512.2	26558	G	T	hCoV-19/deer/USA/OH-OSU-1338/2021\B.1.1.7\Brown\U\2021-11-13	missense_variant	gaG/gaT	Glu12Asp	M	G>T
NODE_0000050	NC_045512.2	27263	C	T	NODE_0000051	missense_variant	aCt/aTt	Thr21Ile	ORF6	C>T
NODE_0000050	NC_045512.2	27751	A	T	hCoV-19/deer/USA/OH-OSU-1338/2021\B.1.1.7\Brown\U\2021-11-13	missense_variant	Aca/Tca	Thr120Ser	ORF7a	A>T
NODE_0000050	NC_045512.2	27765	C	T	hCoV-19/deer/USA/OH-OSU-1331/2021\B.1.1.7\Brown\U\2021-11-13	missense_variant	Ctt/Ttt	Leu4Phe	ORF7b	C>T
NODE_0000050	NC_045512.2	27882	G	C	hCoV-19/deer/USA/OH-OSU-1338/2021\B.1.1.7\Brown\U\2021-11-13	missense_variant	Gcc/Ccc	Ala43Pro	ORF7b	G>C
NODE_0000050	NC_045512.2	27883	C	T	hCoV-19/deer/USA/OH-OSU-1338/2021\B.1.1.7\Brown\U\2021-11-13	missense_variant	gCc/gTc	Ala43Val	ORF7b	C>T
NODE_0000050	NC_045512.2	29167	C	T	NODE_0000051	synonymous_variant	taC/taT	Tyr298Tyr	N	C>T
NODE_0000050	NC_045512.2	29580	C	T	hCoV-19/deer/USA/OH-OSU-1335/2021\B.1.1.7\Brown\U\2021-11-13	missense_variant	gCt/gTt	Ala8Val	ORF10	C>T
NODE_0000050	NC_045512.2	29635	C	T	hCoV-19/deer/USA/OH-OSU-1331/2021\B.1.1.7\Brown\U\2021-11-13	synonymous_variant	taC/taT	Tyr26Tyr	ORF10	C>T
NODE_0000081	NC_045512.2	832	C	T	NODE_0000084	synonymous_variant	aaC/aaT	Asn189Asn	ORF1ab	C>T
NODE_0000081	NC_045512.2	878	C	T	hCoV-19/deer/USA/NY-WTD_165681/2021\EPI_ISL_13658809\2021-11-20	synonymous_variant	Cta/Tta	Leu205Leu	ORF1ab	C>T
NODE_0000081	NC_045512.2	1218	C	T	NODE_0000084	missense_variant	tCa/tTa	Ser318Leu	ORF1ab	C>T
NODE_0000081	NC_045512.2	2062	C	T	hCoV-19/deer/USA/NY-WTD_165681/2021\EPI_ISL_13658809\2021-11-20	synonymous_variant	gcC/gcT	Ala599Ala	ORF1ab	C>T
NODE_0000081	NC_045512.2	3085	G	T	NODE_0000085	missense_variant	gaG/gaT	Glu940Asp	ORF1ab	G>T
NODE_0000081	NC_045512.2	3157	C	T	hCoV-19/deer/USA/NY-WTD_119607/2021\EPI_ISL_13658779\2021-10-27	synonymous_variant	gcC/gcT	Ala964Ala	ORF1ab	C>T
NODE_0000081	NC_045512.2	3622	C	T	hCoV-19/deer/USA/NY-WTD_165681/2021\EPI_ISL_13658809\2021-11-20	synonymous_variant	ggC/ggT	Gly1119Gly	ORF1ab	C>T
NODE_0000081	NC_045512.2	4330	T	C	NODE_0000084	synonymous_variant	atT/atC	Ile1355Ile	ORF1ab	T>C
NODE_0000081	NC_045512.2	4540	C	T	NODE_0000085	synonymous_variant	taC/taT	Tyr1425Tyr	ORF1ab	C>T
NODE_0000081	NC_045512.2	6446	G	A	hCoV-19/deer/USA/NY-WTD_165681/2021\EPI_ISL_13658809\2021-11-20	missense_variant	Gtt/Att	Val2061Ile	ORF1ab	G>A
NODE_0000081	NC_045512.2	7086	C	T	NODE_0000083	missense_variant	aCt/aTt	Thr2274Ile	ORF1ab	C>T
NODE_0000081	NC_045512.2	7303	T	C	hCoV-19/deer/USA/NY-WTD_119567/2021\EPI_ISL_13610667\2021-11-11	synonymous_variant	atT/atC	Ile2346Ile	ORF1ab	T>C
NODE_0000081	NC_045512.2	7389	C	T	NODE_0000083	missense_variant	gCc/gTc	Ala2375Val	ORF1ab	C>T
NODE_0000081	NC_045512.2	7390	C	T	NODE_0000083	synonymous_variant	gcC/gcT	Ala2375Ala	ORF1ab	C>T
NODE_0000081	NC_045512.2	7528	C	T	hCoV-19/deer/USA/NY-WTD_165681/2021\EPI_ISL_13658809\2021-11-20	synonymous_variant	gtC/gtT	Val2421Val	ORF1ab	C>T
NODE_0000081	NC_045512.2	8668	C	T	NODE_0000084	synonymous_variant	gaC/gaT	As801Asp	ORF1ab	C>T
NODE_0000081	NC_045512.2	9204	A	G	NODE_0000083	missense_variant	gAt/gGt	As980Gly	ORF1ab	A>G
NODE_0000081	NC_045512.2	9391	C	T	hCoV-19/deer/USA/NY-WTD_119607/2021\EPI_ISL_13658779\2021-10-27	synonymous_variant	gaC/gaT	As042Asp	ORF1ab	C>T
NODE_0000081	NC_045512.2	9430	C	T	hCoV-19/deer/USA/NY-WTD_119607/2021\EPI_ISL_13658779\2021-10-27	synonymous_variant	atC/atT	Ile3055Ile	ORF1ab	C>T
NODE_0000081	NC_045512.2	9559	C	T	NODE_0000083	synonymous_variant	taC/taT	Tyr3098Tyr	ORF1ab	C>T
NODE_0000081	NC_045512.2	9561	C	T	hCoV-19/deer/USA/NY-WTD_165681/2021\EPI_ISL_13658809\2021-11-20	missense_variant	tCa/tTa	Ser3099Leu	ORF1ab	C>T
NODE_0000081	NC_045512.2	9679	C	T	NODE_0000085	synonymous_variant	ttC/ttT	Phe3138Phe	ORF1ab	C>T
NODE_0000081	NC_045512.2	9679	C	T	hCoV-19/deer/USA/NY-WTD_165681/2021\EPI_ISL_13658809\2021-11-20	synonymous_variant	ttC/ttT	Phe3138Phe	ORF1ab	C>T
NODE_0000081	NC_045512.2	9711	C	T	hCoV-19/deer/USA/NY-WTD_165681/2021\EPI_ISL_13658809\2021-11-20	missense_variant	tCc/tTc	Ser3149Phe	ORF1ab	C>T
NODE_0000081	NC_045512.2	9886	C	T	hCoV-19/deer/USA/NY-WTD_119607/2021\EPI_ISL_13658779\2021-10-27	synonymous_variant	taC/taT	Tyr3207Tyr	ORF1ab	C>T
NODE_0000081	NC_045512.2	9907	C	T	hCoV-19/deer/USA/NY-WTD_119607/2021\EPI_ISL_13658779\2021-10-27	synonymous_variant	taC/taT	Tyr3214Tyr	ORF1ab	C>T
NODE_0000081	NC_045512.2	10908	C	T	hCoV-19/deer/USA/NY-WTD_165681/2021\EPI_ISL_13658809\2021-11-20	missense_variant	gCt/gTt	Ala3548Val	ORF1ab	C>T
NODE_0000081	NC_045512.2	11325	C	T	hCoV-19/deer/USA/NY-WTD_119607/2021\EPI_ISL_13658779\2021-10-27	missense_variant	tCa/tTa	Ser3687Leu	ORF1ab	C>T
NODE_0000081	NC_045512.2	11344	C	T	NODE_0000083	synonymous_variant	atC/atT	Ile3693Ile	ORF1ab	C>T
NODE_0000081	NC_045512.2	11750	C	T	hCoV-19/deer/USA/NY-WTD_165681/2021\EPI_ISL_13658809\2021-11-20	missense_variant	Ctc/Ttc	Leu3829Phe	ORF1ab	C>T
NODE_0000081	NC_045512.2	12076	C	T	hCoV-19/deer/USA/NY-WTD_165681/2021\EPI_ISL_13658809\2021-11-20	synonymous_variant	aaC/aaT	Asn3937Asn	ORF1ab	C>T
NODE_0000081	NC_045512.2	12357	C	T	NODE_0000083	missense_variant	aCa/aTa	Thr4031Ile	ORF1ab	C>T
NODE_0000081	NC_045512.2	12915	C	T	hCoV-19/deer/USA/NY-WTD_165681/2021\EPI_ISL_13658809\2021-11-20	missense_variant	aCa/aTa	Thr4217Ile	ORF1ab	C>T
NODE_0000081	NC_045512.2	14676	T	C	NODE_0000083	synonymous_variant	ccT/ccC	Pro4804Pro	ORF1ab	T>C
NODE_0000081	NC_045512.2	16726	C	T	hCoV-19/deer/USA/NY-WTD_119607/2021\EPI_ISL_13658779\2021-10-27	missense_variant	Cat/Tat	His5488Tyr	ORF1ab	C>T
NODE_0000081	NC_045512.2	18111	T	C	NODE_0000084	synonymous_variant	ccT/ccC	Pro5949Pro	ORF1ab	T>C
NODE_0000081	NC_045512.2	19027	C	T	hCoV-19/deer/USA/NY-WTD_165681/2021\EPI_ISL_13658809\2021-11-20	missense_variant	Cac/Tac	His6255Tyr	ORF1ab	C>T
NODE_0000081	NC_045512.2	20283	C	T	NODE_0000085	synonymous_variant	ttC/ttT	Phe6673Phe	ORF1ab	C>T
NODE_0000081	NC_045512.2	20429	C	T	hCoV-19/deer/USA/NY-WTD_119607/2021\EPI_ISL_13658779\2021-10-27	missense_variant	cCt/cTt	Pro6722Leu	ORF1ab	C>T
NODE_0000081	NC_045512.2	20436	C	T	hCoV-19/deer/USA/NY-WTD_165681/2021\EPI_ISL_13658809\2021-11-20	synonymous_variant	gaC/gaT	As724Asp	ORF1ab	C>T
NODE_0000081	NC_045512.2	20480	C	T	hCoV-19/deer/USA/NY-WTD_119607/2021\EPI_ISL_13658779\2021-10-27	missense_variant	tCa/tTa	Ser6739Leu	ORF1ab	C>T
NODE_0000081	NC_045512.2	21231	A	T	NODE_0000085	synonymous_variant	acA/acT	Thr6989Thr	ORF1ab	A>T
NODE_0000081	NC_045512.2	21648	C	T	NODE_0000084	missense_variant	aCt/aTt	Thr29Ile	S	C>T
NODE_0000081	NC_045512.2	22216	G	C	hCoV-19/deer/USA/NY-WTD_119607/2021\EPI_ISL_13658779\2021-10-27	missense_variant	caG/caC	Gln218His	S	G>C
NODE_0000081	NC_045512.2	22747	C	T	hCoV-19/deer/USA/NY-WTD_165681/2021\EPI_ISL_13658809\2021-11-20	synonymous_variant	gtC/gtT	Val395Val	S	C>T
NODE_0000081	NC_045512.2	23887	C	T	NODE_0000083	synonymous_variant	gaC/gaT	As75Asp	S	C>T
NODE_0000081	NC_045512.2	25006	C	T	hCoV-19/deer/USA/NY-WTD_165681/2021\EPI_ISL_13658809\2021-11-20	synonymous_variant	ttC/ttT	Phe1148Phe	S	C>T
NODE_0000081	NC_045512.2	25184	C	G	NODE_0000085	missense_variant	Cag/Gag	Gln1208Glu	S	C>G
NODE_0000081	NC_045512.2	25513	C	T	NODE_0000084	missense_variant	Ctc/Ttc	Leu41Phe	ORF3a	C>T
NODE_0000081	NC_045512.2	26444	C	T	NODE_0000083	missense_variant	tCt/tTt	Ser67Phe	E	C>T
NODE_0000081	NC_045512.2	27476	C	T	hCoV-19/deer/USA/NY-WTD_165681/2021\EPI_ISL_13658809\2021-11-20	missense_variant	aCa/aTa	Thr28Ile	ORF7a	C>T
NODE_0000081	NC_045512.2	27604	G	C	NODE_0000083	missense_variant	Gta/Cta	Val71Leu	ORF7a	G>C
NODE_0000081	NC_045512.2	27870	G	T	NODE_0000083	stop_gained	Gaa/Taa	Glu39*	ORF7b	G>T
NODE_0000081	NC_045512.2	28817	G	T	NODE_0000083	missense_variant	Gcc/Tcc	Ala182Ser	N	G>T
NODE_0000081	NC_045512.2	29509	C	T	hCoV-19/deer/USA/NY-WTD_165681/2021\EPI_ISL_13658809\2021-11-20	synonymous_variant	agC/agT	Ser412Ser	N	C>T
NODE_0000081	NC_045512.2	29642	C	T	NODE_0000085	stop_gained	Caa/Taa	Gln29*	ORF10	C>T
NODE_0000081	NC_045512.2	29666	C	T	hCoV-19/deer/USA/NY-WTD_165681/2021\EPI_ISL_13658809\2021-11-20	missense_variant	Ctc/Ttc	Leu37Phe	ORF10	C>T
NODE_0000120	NC_045512.2	840	G	A	NODE_0000121	missense_variant	gGc/gAc	Gly192Asp	ORF1ab	G>A
NODE_0000120	NC_045512.2	2044	C	T	NODE_0000121	synonymous_variant	aaC/aaT	Asn593Asn	ORF1ab	C>T
NODE_0000120	NC_045512.2	7318	C	T	NODE_0000121	synonymous_variant	ttC/ttT	Phe2351Phe	ORF1ab	C>T
NODE_0000120	NC_045512.2	9195	C	T	NODE_0000121	missense_variant	aCa/aTa	Thr2977Ile	ORF1ab	C>T
NODE_0000120	NC_045512.2	9322	T	C	NODE_0000121	synonymous_variant	tgT/tgC	Cys3019Cys	ORF1ab	T>C
NODE_0000120	NC_045512.2	9391	C	T	NODE_0000121	synonymous_variant	gaC/gaT	As042Asp	ORF1ab	C>T
NODE_0000120	NC_045512.2	10525	C	T	NODE_0000121	synonymous_variant	gtC/gtT	Val3420Val	ORF1ab	C>T
NODE_0000120	NC_045512.2	10537	C	T	NODE_0000121	synonymous_variant	taC/taT	Tyr3424Tyr	ORF1ab	C>T
NODE_0000120	NC_045512.2	10798	C	T	NODE_0000121	synonymous_variant	gaC/gaT	As511Asp	ORF1ab	C>T
NODE_0000120	NC_045512.2	11339	C	T	NODE_0000121	synonymous_variant	Cta/Tta	Leu3692Leu	ORF1ab	C>T
NODE_0000120	NC_045512.2	12073	C	T	NODE_0000121	synonymous_variant	gaC/gaT	As936Asp	ORF1ab	C>T
NODE_0000120	NC_045512.2	12076	C	T	NODE_0000121	synonymous_variant	aaC/aaT	Asn3937Asn	ORF1ab	C>T
NODE_0000120	NC_045512.2	12141	C	T	hCoV-19/deer/USA/NY-WTD_164522/2021\EPI_ISL_13610634\2021-11-05	missense_variant	aCt/aTt	Thr3959Ile	ORF1ab	C>T
NODE_0000120	NC_045512.2	12789	C	T	NODE_0000121	missense_variant	aCa/aTa	Thr4175Ile	ORF1ab	C>T
NODE_0000120	NC_045512.2	12973	C	T	hCoV-19/deer/USA/NY-WTD_152918/2021\EPI_ISL_13658777\2021-10-02	synonymous_variant	aaC/aaT	Asn4236Asn	ORF1ab	C>T
NODE_0000120	NC_045512.2	14676	T	C	NODE_0000121	synonymous_variant	ccT/ccC	Pro4804Pro	ORF1ab	T>C
NODE_0000120	NC_045512.2	15951	C	T	NODE_0000121	synonymous_variant	atC/atT	Ile5229Ile	ORF1ab	C>T
NODE_0000120	NC_045512.2	19170	C	T	NODE_0000121	synonymous_variant	ttC/ttT	Phe6302Phe	ORF1ab	C>T
NODE_0000120	NC_045512.2	20259	C	T	NODE_0000121	synonymous_variant	ttC/ttT	Phe6665Phe	ORF1ab	C>T
NODE_0000120	NC_045512.2	20289	A	G	hCoV-19/deer/USA/NY-WTD_164522/2021\EPI_ISL_13610634\2021-11-05	synonymous_variant	gaA/gaG	Glu6675Glu	ORF1ab	A>G
NODE_0000120	NC_045512.2	20589	C	T	NODE_0000121	synonymous_variant	gaC/gaT	As775Asp	ORF1ab	C>T
NODE_0000120	NC_045512.2	21073	G	T	hCoV-19/deer/USA/NY-WTD_164522/2021\EPI_ISL_13610634\2021-11-05	missense_variant	Gtt/Ttt	Val6937Phe	ORF1ab	G>T
NODE_0000120	NC_045512.2	21193	G	T	NODE_0000121	missense_variant	Gat/Tat	As977Tyr	ORF1ab	G>T
NODE_0000120	NC_045512.2	21194	A	G	NODE_0000121	missense_variant	gAt/gGt	As977Gly	ORF1ab	A>G
NODE_0000120	NC_045512.2	22555	T	C	NODE_0000121	synonymous_variant	aaT/aaC	Asn331Asn	S	T>C
NODE_0000120	NC_045512.2	24054	C	T	NODE_0000121	missense_variant	gCt/gTt	Ala831Val	S	C>T
NODE_0000120	NC_045512.2	25169	C	T	NODE_0000121	missense_variant	Ctt/Ttt	Leu1203Phe	S	C>T
NODE_0000120	NC_045512.2	25773	T	A	NODE_0000121	synonymous_variant	ctT/ctA	Leu127Leu	ORF3a	T>A
NODE_0000120	NC_045512.2	28093	C	T	NODE_0000121	missense_variant	tCt/tTt	Ser67Phe	ORF8	C>T
NODE_0000120	NC_045512.2	29614	C	T	NODE_0000121	synonymous_variant	tgC/tgT	Cys19Cys	ORF10	C>T
NODE_0000160	NC_045512.2	335	C	T	NODE_0000166	missense_variant	Cgc/Tgc	Arg24Cys	ORF1ab	C>T
NODE_0000160	NC_045512.2	337	C	T	hCoV-19/deer/USA/OH-OSU-1459/2021\B.1.1.7\Pickaway\U\2021-11-13	synonymous_variant	cgC/cgT	Arg24Arg	ORF1ab	C>T
NODE_0000160	NC_045512.2	343	G	T	NODE_0000166	synonymous_variant	gtG/gtT	Val26Val	ORF1ab	G>T
NODE_0000160	NC_045512.2	379	C	T	NODE_0000166	synonymous_variant	gtC/gtT	Val38Val	ORF1ab	C>T
NODE_0000160	NC_045512.2	379	T	C	hCoV-19/deer/USA/OH-OSU-1480/2021\B.1.1.7\Pickaway\U\2021-11-13	synonymous_variant	gtT/gtC	Val38Val	ORF1ab	T>C
NODE_0000160	NC_045512.2	703	C	T	NODE_0000166	synonymous_variant	ggC/ggT	Gly146Gly	ORF1ab	C>T
NODE_0000160	NC_045512.2	812	A	G	NODE_0000166	missense_variant	Act/Gct	Thr183Ala	ORF1ab	A>G
NODE_0000160	NC_045512.2	1551	C	T	NODE_0000165	missense_variant	gCt/gTt	Ala429Val	ORF1ab	C>T
NODE_0000160	NC_045512.2	1555	C	T	hCoV-19/deer/USA/OH-OSU-2077/2021\B.1.1.7\Highland\R\2021-12-04	synonymous_variant	aaC/aaT	Asn430Asn	ORF1ab	C>T
NODE_0000160	NC_045512.2	1681	G	A	NODE_0000165	synonymous_variant	gaG/gaA	Glu472Glu	ORF1ab	G>A
NODE_0000160	NC_045512.2	3004	G	T	NODE_0000164	missense_variant	gaG/gaT	Glu913Asp	ORF1ab	G>T
NODE_0000160	NC_045512.2	3397	C	T	NODE_0000165	synonymous_variant	gaC/gaT	As044Asp	ORF1ab	C>T
NODE_0000160	NC_045512.2	4055	C	T	hCoV-19/deer/USA/OH-OSU-2077/2021\B.1.1.7\Highland\R\2021-12-04	missense_variant	Cat/Tat	His1264Tyr	ORF1ab	C>T
NODE_0000160	NC_045512.2	5077	T	C	NODE_0000165	synonymous_variant	gtT/gtC	Val1604Val	ORF1ab	T>C
NODE_0000160	NC_045512.2	5892	C	A	hCoV-19/deer/USA/OH-OSU-1459/2021\B.1.1.7\Pickaway\U\2021-11-13	missense_variant	aCc/aAc	Thr1876Asn	ORF1ab	C>A
NODE_0000160	NC_045512.2	7000	C	T	NODE_0000166	synonymous_variant	taC/taT	Tyr2245Tyr	ORF1ab	C>T
NODE_0000160	NC_045512.2	7029	C	T	NODE_0000165	missense_variant	tCt/tTt	Ser2255Phe	ORF1ab	C>T
NODE_0000160	NC_045512.2	7267	C	T	hCoV-19/deer/USA/OH-OSU-2077/2021\B.1.1.7\Highland\R\2021-12-04	synonymous_variant	ttC/ttT	Phe2334Phe	ORF1ab	C>T
NODE_0000160	NC_045512.2	7267	C	T	NODE_0000167	synonymous_variant	ttC/ttT	Phe2334Phe	ORF1ab	C>T
NODE_0000160	NC_045512.2	7279	C	T	hCoV-19/deer/USA/OH-OSU-2077/2021\B.1.1.7\Highland\R\2021-12-04	synonymous_variant	ttC/ttT	Phe2338Phe	ORF1ab	C>T
NODE_0000160	NC_045512.2	7303	C	T	NODE_0000164	synonymous_variant	atC/atT	Ile2346Ile	ORF1ab	C>T
NODE_0000160	NC_045512.2	7528	C	T	NODE_0000164	synonymous_variant	gtC/gtT	Val2421Val	ORF1ab	C>T
NODE_0000160	NC_045512.2	7765	C	T	hCoV-19/deer/USA/OH-OSU-1490/2021\B.1.1.7\Pickaway\U\2021-11-13	synonymous_variant	tcC/tcT	Ser2500Ser	ORF1ab	C>T
NODE_0000160	NC_045512.2	7855	T	C	NODE_0000166	synonymous_variant	aaT/aaC	Asn2530Asn	ORF1ab	T>C
NODE_0000160	NC_045512.2	8097	C	T	NODE_0000166	missense_variant	aCa/aTa	Thr2611Ile	ORF1ab	C>T
NODE_0000160	NC_045512.2	9198	C	T	hCoV-19/deer/USA/OH-OSU-1480/2021\B.1.1.7\Pickaway\U\2021-11-13	missense_variant	aCt/aTt	Thr2978Ile	ORF1ab	C>T
NODE_0000160	NC_045512.2	9430	C	T	NODE_0000164	synonymous_variant	atC/atT	Ile3055Ile	ORF1ab	C>T
NODE_0000160	NC_045512.2	9491	C	T	hCoV-19/deer/USA/OH-OSU-2077/2021\B.1.1.7\Highland\R\2021-12-04	missense_variant	Cat/Tat	His3076Tyr	ORF1ab	C>T
NODE_0000160	NC_045512.2	9532	C	T	hCoV-19/deer/USA/OH-OSU-2077/2021\B.1.1.7\Highland\R\2021-12-04	synonymous_variant	ttC/ttT	Phe3089Phe	ORF1ab	C>T
NODE_0000160	NC_045512.2	9559	C	T	NODE_0000166	synonymous_variant	taC/taT	Tyr3098Tyr	ORF1ab	C>T
NODE_0000160	NC_045512.2	9679	C	T	NODE_0000165	synonymous_variant	ttC/ttT	Phe3138Phe	ORF1ab	C>T
NODE_0000160	NC_045512.2	9700	C	T	NODE_0000166	synonymous_variant	atC/atT	Ile3145Ile	ORF1ab	C>T
NODE_0000160	NC_045512.2	9836	C	T	NODE_0000166	synonymous_variant	Cta/Tta	Leu3191Leu	ORF1ab	C>T
NODE_0000160	NC_045512.2	11152	C	T	NODE_0000165	synonymous_variant	gtC/gtT	Val3629Val	ORF1ab	C>T
NODE_0000160	NC_045512.2	11195	C	T	hCoV-19/deer/USA/OH-OSU-1459/2021\B.1.1.7\Pickaway\U\2021-11-13	missense_variant	Ctt/Ttt	Leu3644Phe	ORF1ab	C>T
NODE_0000160	NC_045512.2	11224	C	T	NODE_0000165	synonymous_variant	gtC/gtT	Val3653Val	ORF1ab	C>T
NODE_0000160	NC_045512.2	11413	A	G	NODE_0000166	synonymous_variant	acA/acG	Thr3716Thr	ORF1ab	A>G
NODE_0000160	NC_045512.2	11620	C	T	NODE_0000165	synonymous_variant	ttC/ttT	Phe3785Phe	ORF1ab	C>T
NODE_0000160	NC_045512.2	11644	C	T	NODE_0000165	synonymous_variant	taC/taT	Tyr3793Tyr	ORF1ab	C>T
NODE_0000160	NC_045512.2	11653	C	T	NODE_0000165	synonymous_variant	ctC/ctT	Leu3796Leu	ORF1ab	C>T
NODE_0000160	NC_045512.2	12049	C	T	NODE_0000165	synonymous_variant	aaC/aaT	Asn3928Asn	ORF1ab	C>T
NODE_0000160	NC_045512.2	12445	C	T	NODE_0000166	synonymous_variant	aaC/aaT	Asn4060Asn	ORF1ab	C>T
NODE_0000160	NC_045512.2	12596	C	T	NODE_0000166	missense_variant	Ctt/Ttt	Leu4111Phe	ORF1ab	C>T
NODE_0000160	NC_045512.2	12763	C	T	NODE_0000166	synonymous_variant	gaC/gaT	As166Asp	ORF1ab	C>T
NODE_0000160	NC_045512.2	13452	C	T	NODE_0000165	missense_variant	gCa/gTa	Ala4396Val	ORF1ab	C>T
NODE_0000160	NC_045512.2	14409	T	C	NODE_0000165	synonymous_variant	ccT/ccC	Pro4715Pro	ORF1ab	T>C
NODE_0000160	NC_045512.2	14497	G	A	hCoV-19/deer/USA/OH-OSU-2077/2021\B.1.1.7\Highland\R\2021-12-04	missense_variant	Gtt/Att	Val4745Ile	ORF1ab	G>A
NODE_0000160	NC_045512.2	14790	C	T	NODE_0000165	synonymous_variant	atC/atT	Ile4842Ile	ORF1ab	C>T
NODE_0000160	NC_045512.2	15212	C	T	NODE_0000166	missense_variant	aCa/aTa	Thr4983Ile	ORF1ab	C>T
NODE_0000160	NC_045512.2	16185	T	C	hCoV-19/deer/USA/OH-OSU-2077/2021\B.1.1.7\Highland\R\2021-12-04	synonymous_variant	taT/taC	Tyr5307Tyr	ORF1ab	T>C
NODE_0000160	NC_045512.2	16329	C	T	NODE_0000166	synonymous_variant	taC/taT	Tyr5355Tyr	ORF1ab	C>T
NODE_0000160	NC_045512.2	16750	C	T	NODE_0000166	missense_variant	Cct/Tct	Pro5496Ser	ORF1ab	C>T
NODE_0000160	NC_045512.2	16750	T	C	hCoV-19/deer/USA/OH-OSU-1480/2021\B.1.1.7\Pickaway\U\2021-11-13	missense_variant	Tct/Cct	Ser5496Pro	ORF1ab	T>C
NODE_0000160	NC_045512.2	16945	G	A	NODE_0000166	missense_variant	Gca/Aca	Ala5561Thr	ORF1ab	G>A
NODE_0000160	NC_045512.2	18570	C	T	NODE_0000165	synonymous_variant	ctC/ctT	Leu6102Leu	ORF1ab	C>T
NODE_0000160	NC_045512.2	18581	T	C	NODE_0000166	missense_variant	gTc/gCc	Val6106Ala	ORF1ab	T>C
NODE_0000160	NC_045512.2	18583	G	A	NODE_0000166	missense_variant	Gta/Ata	Val6107Ile	ORF1ab	G>A
NODE_0000160	NC_045512.2	19170	C	T	NODE_0000166	synonymous_variant	ttC/ttT	Phe6302Phe	ORF1ab	C>T
NODE_0000160	NC_045512.2	19677	G	T	NODE_0000165	missense_variant	caG/caT	Gln6471His	ORF1ab	G>T
NODE_0000160	NC_045512.2	20117	C	T	hCoV-19/deer/USA/OH-OSU-2077/2021\B.1.1.7\Highland\R\2021-12-04	missense_variant	aCa/aTa	Thr6618Ile	ORF1ab	C>T
NODE_0000160	NC_045512.2	20259	C	T	hCoV-19/deer/USA/OH-OSU-2077/2021\B.1.1.7\Highland\R\2021-12-04	synonymous_variant	ttC/ttT	Phe6665Phe	ORF1ab	C>T
NODE_0000160	NC_045512.2	20526	T	C	NODE_0000165	synonymous_variant	ttT/ttC	Phe6754Phe	ORF1ab	T>C
NODE_0000160	NC_045512.2	21202	A	G	NODE_0000166	missense_variant	Aag/Gag	Lys6980Glu	ORF1ab	A>G
NODE_0000160	NC_045512.2	21396	C	T	NODE_0000166	synonymous_variant	gaC/gaT	As044Asp	ORF1ab	C>T
NODE_0000160	NC_045512.2	21513	C	T	NODE_0000166	synonymous_variant	aaC/aaT	Asn7083Asn	ORF1ab	C>T
NODE_0000160	NC_045512.2	23010	T	C	hCoV-19/deer/USA/OH-OSU-1490/2021\B.1.1.7\Pickaway\U\2021-11-13	missense_variant	gTt/gCt	Val483Ala	S	T>C
NODE_0000160	NC_045512.2	23641	T	A	NODE_0000166	synonymous_variant	atT/atA	Ile693Ile	S	T>A
NODE_0000160	NC_045512.2	24904	C	T	hCoV-19/deer/USA/OH-OSU-1459/2021\B.1.1.7\Pickaway\U\2021-11-13	synonymous_variant	atC/atT	Ile1114Ile	S	C>T
NODE_0000160	NC_045512.2	24914	C	G	hCoV-19/deer/USA/OH-OSU-1459/2021\B.1.1.7\Pickaway\U\2021-11-13	missense_variant	Cac/Gac	His1118Asp	S	C>G
NODE_0000160	NC_045512.2	25207	C	T	NODE_0000165	synonymous_variant	taC/taT	Tyr1215Tyr	S	C>T
NODE_0000160	NC_045512.2	25463	C	T	NODE_0000167	missense_variant	aCt/aTt	Thr24Ile	ORF3a	C>T
NODE_0000160	NC_045512.2	25469	C	T	hCoV-19/deer/USA/OH-OSU-1403/2021\B.1.1.7\Highland\R\2021-11-08	missense_variant	tCa/tTa	Ser26Leu	ORF3a	C>T
NODE_0000160	NC_045512.2	25469	C	T	hCoV-19/deer/USA/OH-OSU-1459/2021\B.1.1.7\Pickaway\U\2021-11-13	missense_variant	tCa/tTa	Ser26Leu	ORF3a	C>T
NODE_0000160	NC_045512.2	25702	C	T	NODE_0000167	missense_variant	Cct/Tct	Pro104Ser	ORF3a	C>T
NODE_0000160	NC_045512.2	25714	C	T	NODE_0000165	missense_variant	Ctt/Ttt	Leu108Phe	ORF3a	C>T
NODE_0000160	NC_045512.2	25810	C	T	NODE_0000165	missense_variant	Ctt/Ttt	Leu140Phe	ORF3a	C>T
NODE_0000160	NC_045512.2	26118	A	T	NODE_0000165	missense_variant	gaA/gaT	Glu242Asp	ORF3a	A>T
NODE_0000160	NC_045512.2	26456	C	T	NODE_0000166	missense_variant	cCt/cTt	Pro71Leu	E	C>T
NODE_0000160	NC_045512.2	26801	C	T	NODE_0000165	synonymous_variant	ctC/ctT	Leu93Leu	M	C>T
NODE_0000160	NC_045512.2	26842	G	T	hCoV-19/deer/USA/OH-OSU-1459/2021\B.1.1.7\Pickaway\U\2021-11-13	missense_variant	cGt/cTt	Arg107Leu	M	G>T
NODE_0000160	NC_045512.2	27059	C	T	NODE_0000165	synonymous_variant	taC/taT	Tyr179Tyr	M	C>T
NODE_0000160	NC_045512.2	27143	C	T	NODE_0000165	synonymous_variant	aaC/aaT	Asn207Asn	M	C>T
NODE_0000160	NC_045512.2	27584	C	T	NODE_0000165	missense_variant	gCt/gTt	Ala64Val	ORF7a	C>T
NODE_0000160	NC_045512.2	27849	C	T	NODE_0000166	missense_variant	Ctt/Ttt	Leu32Phe	ORF7b	C>T
NODE_0000160	NC_045512.2	27874	C	T	NODE_0000165	missense_variant	aCt/aTt	Thr40Ile	ORF7b	C>T
NODE_0000160	NC_045512.2	27972	T	C	NODE_0000165	stop_loss	Taa/Caa	*27Gln	ORF8	T>C
NODE_0000160	NC_045512.2	27998	C	A	hCoV-19/deer/USA/OH-OSU-1403/2021\B.1.1.7\Highland\R\2021-11-08	missense_variant	gaC/gaA	As5Glu	ORF8	C>A
NODE_0000160	NC_045512.2	28016	C	T	NODE_0000166	synonymous_variant	ttC/ttT	Phe41Phe	ORF8	C>T
NODE_0000160	NC_045512.2	28048	T	G	hCoV-19/deer/USA/OH-OSU-2077/2021\B.1.1.7\Highland\R\2021-12-04	missense_variant	aTa/aGa	Ile52Arg	ORF8	T>G
NODE_0000160	NC_045512.2	28111	G	A	hCoV-19/deer/USA/OH-OSU-1459/2021\B.1.1.7\Pickaway\U\2021-11-13	missense_variant	tGc/tAc	Cys73Tyr	ORF8	G>A
NODE_0000160	NC_045512.2	28268	A	C	NODE_0000165	intergenic_region		n.28268A>C		A>C
NODE_0000160	NC_045512.2	28744	C	T	NODE_0000166	synonymous_variant	atC/atT	Ile157Ile	N	C>T
NODE_0000160	NC_045512.2	29179	G	T	hCoV-19/deer/USA/OH-OSU-2077/2021\B.1.1.7\Highland\R\2021-12-04	synonymous_variant	ccG/ccT	Pro302Pro	N	G>T
NODE_0000160	NC_045512.2	29635	C	T	NODE_0000166	synonymous_variant	taC/taT	Tyr26Tyr	ORF10	C>T
NODE_0000160	NC_045512.2	29659	C	T	hCoV-19/deer/USA/OH-OSU-1403/2021\B.1.1.7\Highland\R\2021-11-08	synonymous_variant	aaC/aaT	Asn34Asn	ORF10	C>T
NODE_0000160	NC_045512.2	29666	C	T	NODE_0000166	missense_variant	Ctc/Ttc	Leu37Phe	ORF10	C>T
NODE_0000249	NC_045512.2	284	G	A	NODE_0000252	missense_variant	Ggt/Agt	Gly7Ser	ORF1ab	G>A
NODE_0000249	NC_045512.2	861	A	C	NODE_0000253	missense_variant	gAg/gCg	Glu199Ala	ORF1ab	A>C
NODE_0000249	NC_045512.2	1057	C	T	NODE_0000252	synonymous_variant	gaC/gaT	As64Asp	ORF1ab	C>T
NODE_0000249	NC_045512.2	1371	A	G	hCoV-19/deer/USA/NY-WTD_165920/2021\EPI_ISL_13610694\2021-12-04	missense_variant	tAt/tGt	Tyr369Cys	ORF1ab	A>G
NODE_0000249	NC_045512.2	1780	C	T	NODE_0000253	synonymous_variant	tcC/tcT	Ser505Ser	ORF1ab	C>T
NODE_0000249	NC_045512.2	3177	C	T	hCoV-19/deer/USA/NY-WTD_164713/2021\EPI_ISL_13610676\2021-11-15	missense_variant	cCt/cTt	Pro971Leu	ORF1ab	C>T
NODE_0000249	NC_045512.2	3239	G	T	hCoV-19/deer/USA/NY-WTD_165621/2021\EPI_ISL_13658785\2021-11-02	missense_variant	Gac/Tac	As92Tyr	ORF1ab	G>T
NODE_0000249	NC_045512.2	3787	C	T	hCoV-19/deer/USA/NY-WTD_164713/2021\EPI_ISL_13610676\2021-11-15	synonymous_variant	taC/taT	Tyr1174Tyr	ORF1ab	C>T
NODE_0000249	NC_045512.2	3796	C	T	hCoV-19/deer/USA/NY-WTD_164713/2021\EPI_ISL_13610676\2021-11-15	synonymous_variant	gtC/gtT	Val1177Val	ORF1ab	C>T
NODE_0000249	NC_045512.2	4009	C	T	NODE_0000252	synonymous_variant	ttC/ttT	Phe1248Phe	ORF1ab	C>T
NODE_0000249	NC_045512.2	4212	C	T	NODE_0000251	missense_variant	gCt/gTt	Ala1316Val	ORF1ab	C>T
NODE_0000249	NC_045512.2	5053	A	G	NODE_0000252	synonymous_variant	ccA/ccG	Pro1596Pro	ORF1ab	A>G
NODE_0000249	NC_045512.2	5248	T	C	NODE_0000251	synonymous_variant	gtT/gtC	Val1661Val	ORF1ab	T>C
NODE_0000249	NC_045512.2	6954	C	T	NODE_0000252	missense_variant	aCa/aTa	Thr2230Ile	ORF1ab	C>T
NODE_0000249	NC_045512.2	6990	C	T	NODE_0000252	missense_variant	tCt/tTt	Ser2242Phe	ORF1ab	C>T
NODE_0000249	NC_045512.2	7303	C	T	NODE_0000251	synonymous_variant	atC/atT	Ile2346Ile	ORF1ab	C>T
NODE_0000249	NC_045512.2	8170	A	G	NODE_0000254	synonymous_variant	tcA/tcG	Ser2635Ser	ORF1ab	A>G
NODE_0000249	NC_045512.2	8595	C	T	NODE_0000254	missense_variant	aCa/aTa	Thr2777Ile	ORF1ab	C>T
NODE_0000249	NC_045512.2	8626	C	T	NODE_0000254	synonymous_variant	ttC/ttT	Phe2787Phe	ORF1ab	C>T
NODE_0000249	NC_045512.2	9430	C	T	NODE_0000251	synonymous_variant	atC/atT	Ile3055Ile	ORF1ab	C>T
NODE_0000249	NC_045512.2	9679	C	T	NODE_0000252	synonymous_variant	ttC/ttT	Phe3138Phe	ORF1ab	C>T
NODE_0000249	NC_045512.2	9679	C	T	hCoV-19/deer/USA/NY-WTD_164713/2021\EPI_ISL_13610676\2021-11-15	synonymous_variant	ttC/ttT	Phe3138Phe	ORF1ab	C>T
NODE_0000249	NC_045512.2	9733	C	T	NODE_0000253	synonymous_variant	ttC/ttT	Phe3156Phe	ORF1ab	C>T
NODE_0000249	NC_045512.2	9836	C	T	NODE_0000252	synonymous_variant	Cta/Tta	Leu3191Leu	ORF1ab	C>T
NODE_0000249	NC_045512.2	10582	C	T	NODE_0000252	synonymous_variant	gaC/gaT	As439Asp	ORF1ab	C>T
NODE_0000249	NC_045512.2	10868	C	T	NODE_0000254	synonymous_variant	Ctg/Ttg	Leu3535Leu	ORF1ab	C>T
NODE_0000249	NC_045512.2	11514	C	T	NODE_0000253	missense_variant	aCt/aTt	Thr3750Ile	ORF1ab	C>T
NODE_0000249	NC_045512.2	11668	C	T	hCoV-19/deer/USA/NY-WTD_165920/2021\EPI_ISL_13610694\2021-12-04	synonymous_variant	aaC/aaT	Asn3801Asn	ORF1ab	C>T
NODE_0000249	NC_045512.2	11750	C	T	NODE_0000252	missense_variant	Ctc/Ttc	Leu3829Phe	ORF1ab	C>T
NODE_0000249	NC_045512.2	11973	A	G	hCoV-19/deer/USA/NY-WTD_164713/2021\EPI_ISL_13610676\2021-11-15	missense_variant	gAt/gGt	As903Gly	ORF1ab	A>G
NODE_0000249	NC_045512.2	12076	C	T	NODE_0000252	synonymous_variant	aaC/aaT	Asn3937Asn	ORF1ab	C>T
NODE_0000249	NC_045512.2	12357	C	T	NODE_0000252	missense_variant	aCa/aTa	Thr4031Ile	ORF1ab	C>T
NODE_0000249	NC_045512.2	12676	C	T	NODE_0000253	synonymous_variant	gtC/gtT	Val4137Val	ORF1ab	C>T
NODE_0000249	NC_045512.2	12789	C	T	NODE_0000254	missense_variant	aCa/aTa	Thr4175Ile	ORF1ab	C>T
NODE_0000249	NC_045512.2	14376	C	T	NODE_0000252	synonymous_variant	aaC/aaT	Asn4704Asn	ORF1ab	C>T
NODE_0000249	NC_045512.2	14676	C	T	NODE_0000255	synonymous_variant	ccC/ccT	Pro4804Pro	ORF1ab	C>T
NODE_0000249	NC_045512.2	14676	T	C	NODE_0000251	synonymous_variant	ccT/ccC	Pro4804Pro	ORF1ab	T>C
NODE_0000249	NC_045512.2	15982	G	A	NODE_0000251	missense_variant	Gta/Ata	Val5240Ile	ORF1ab	G>A
NODE_0000249	NC_045512.2	17676	C	T	NODE_0000252	synonymous_variant	atC/atT	Ile5804Ile	ORF1ab	C>T
NODE_0000249	NC_045512.2	17983	G	T	NODE_0000252	missense_variant	Gac/Tac	As907Tyr	ORF1ab	G>T
NODE_0000249	NC_045512.2	18108	A	T	NODE_0000252	synonymous_variant	gcA/gcT	Ala5948Ala	ORF1ab	A>T
NODE_0000249	NC_045512.2	18979	C	T	NODE_0000253	missense_variant	Cac/Tac	His6239Tyr	ORF1ab	C>T
NODE_0000249	NC_045512.2	19160	C	T	NODE_0000252	missense_variant	tCt/tTt	Ser6299Phe	ORF1ab	C>T
NODE_0000249	NC_045512.2	19506	T	C	hCoV-19/deer/USA/NY-WTD_165920/2021\EPI_ISL_13610694\2021-12-04	synonymous_variant	aaT/aaC	Asn6414Asn	ORF1ab	T>C
NODE_0000249	NC_045512.2	19683	A	G	NODE_0000252	synonymous_variant	gaA/gaG	Glu6473Glu	ORF1ab	A>G
NODE_0000249	NC_045512.2	19763	C	T	NODE_0000255	missense_variant	aCa/aTa	Thr6500Ile	ORF1ab	C>T
NODE_0000249	NC_045512.2	20703	C	T	hCoV-19/deer/USA/NY-WTD_165621/2021\EPI_ISL_13658785\2021-11-02	synonymous_variant	taC/taT	Tyr6813Tyr	ORF1ab	C>T
NODE_0000249	NC_045512.2	20733	T	C	NODE_0000253	synonymous_variant	tgT/tgC	Cys6823Cys	ORF1ab	T>C
NODE_0000249	NC_045512.2	21646	C	T	NODE_0000251	synonymous_variant	taC/taT	Tyr28Tyr	S	C>T
NODE_0000249	NC_045512.2	21853	G	T	NODE_0000254	missense_variant	aaG/aaT	Lys97Asn	S	G>T
NODE_0000249	NC_045512.2	22095	A	G	NODE_0000252	missense_variant	gAc/gGc	As78Gly	S	A>G
NODE_0000249	NC_045512.2	22267	C	T	NODE_0000253	synonymous_variant	atC/atT	Ile235Ile	S	C>T
NODE_0000249	NC_045512.2	22301	A	G	NODE_0000253	missense_variant	Agt/Ggt	Ser247Gly	S	A>G
NODE_0000249	NC_045512.2	22896	T	C	NODE_0000252	missense_variant	gTt/gCt	Val445Ala	S	T>C
NODE_0000249	NC_045512.2	24145	G	A	NODE_0000254	synonymous_variant	ttG/ttA	Leu861Leu	S	G>A
NODE_0000249	NC_045512.2	25207	C	T	hCoV-19/deer/USA/NY-WTD_165892/2021\EPI_ISL_13610686\2021-11-20	synonymous_variant	taC/taT	Tyr1215Tyr	S	C>T
NODE_0000249	NC_045512.2	25317	C	T	NODE_0000252	missense_variant	tCc/tTc	Ser1252Phe	S	C>T
NODE_0000249	NC_045512.2	26195	C	T	NODE_0000252	missense_variant	aCg/aTg	Thr268Met	ORF3a	C>T
NODE_0000249	NC_045512.2	27625	C	T	NODE_0000252	missense_variant	Cgt/Tgt	Arg78Cys	ORF7a	C>T
NODE_0000249	NC_045512.2	27626	G	A	NODE_0000252	missense_variant	cGt/cAt	Arg78His	ORF7a	G>A
NODE_0000249	NC_045512.2	27643	C	T	hCoV-19/deer/USA/NY-WTD_165920/2021\EPI_ISL_13610694\2021-12-04	missense_variant	Cct/Tct	Pro84Ser	ORF7a	C>T
NODE_0000249	NC_045512.2	27769	C	T	hCoV-19/deer/USA/NY-WTD_164713/2021\EPI_ISL_13610676\2021-11-15	missense_variant	tCa/tTa	Ser5Leu	ORF7b	C>T
NODE_0000249	NC_045512.2	28054	C	T	NODE_0000251	missense_variant	tCa/tTa	Ser54Leu	ORF8	C>T
NODE_0000249	NC_045512.2	28095	T	A	hCoV-19/deer/USA/NY-WTD_164713/2021\EPI_ISL_13610676\2021-11-15	stop_loss	Taa/Aaa	*68Lys	ORF8	T>A
NODE_0000249	NC_045512.2	28603	C	T	hCoV-19/deer/USA/NY-WTD_165920/2021\EPI_ISL_13610694\2021-12-04	synonymous_variant	ttC/ttT	Phe110Phe	N	C>T
NODE_0000249	NC_045512.2	28677	C	T	NODE_0000253	missense_variant	aCt/aTt	Thr135Ile	N	C>T
NODE_0000249	NC_045512.2	29167	C	T	NODE_0000252	synonymous_variant	taC/taT	Tyr298Tyr	N	C>T
NODE_0000249	NC_045512.2	29311	C	T	NODE_0000253	synonymous_variant	ttC/ttT	Phe346Phe	N	C>T
NODE_0000249	NC_045512.2	29632	C	T	NODE_0000253	synonymous_variant	aaC/aaT	Asn25Asn	ORF10	C>T
NODE_0000249	NC_045512.2	29659	C	T	hCoV-19/deer/USA/NY-WTD_164713/2021\EPI_ISL_13610676\2021-11-15	synonymous_variant	aaC/aaT	Asn34Asn	ORF10	C>T
NODE_0000279	NC_045512.2	595	T	C	NODE_0000282	synonymous_variant	caT/caC	His110His	ORF1ab	T>C
NODE_0000279	NC_045512.2	969	A	G	NODE_0000280	missense_variant	gAg/gGg	Glu235Gly	ORF1ab	A>G
NODE_0000279	NC_045512.2	2062	C	T	NODE_0000280	synonymous_variant	gcC/gcT	Ala599Ala	ORF1ab	C>T
NODE_0000279	NC_045512.2	2110	C	T	hCoV-19/deer/USA/NY-WTD_164707/2021\EPI_ISL_13610650\2021-11-06	synonymous_variant	aaC/aaT	Asn615Asn	ORF1ab	C>T
NODE_0000279	NC_045512.2	3225	C	T	hCoV-19/deer/USA/NY-WTD_155877/2021\EPI_ISL_13610592\2021-10-02	missense_variant	aCt/aTt	Thr987Ile	ORF1ab	C>T
NODE_0000279	NC_045512.2	6484	A	T	hCoV-19/deer/USA/NY-WTD_164707/2021\EPI_ISL_13610650\2021-11-06	synonymous_variant	ggA/ggT	Gly2073Gly	ORF1ab	A>T
NODE_0000279	NC_045512.2	7108	C	T	NODE_0000282	synonymous_variant	taC/taT	Tyr2281Tyr	ORF1ab	C>T
NODE_0000279	NC_045512.2	7113	C	T	hCoV-19/deer/USA/NY-WTD_119505/2021\EPI_ISL_13610625\2021-11-02	missense_variant	aCt/aTt	Thr2283Ile	ORF1ab	C>T
NODE_0000279	NC_045512.2	7267	C	T	hCoV-19/deer/USA/NY-WTD_119480/2021\EPI_ISL_13610610\2021-10-27	synonymous_variant	ttC/ttT	Phe2334Phe	ORF1ab	C>T
NODE_0000279	NC_045512.2	7303	C	T	NODE_0000280	synonymous_variant	atC/atT	Ile2346Ile	ORF1ab	C>T
NODE_0000279	NC_045512.2	7318	C	T	NODE_0000283	synonymous_variant	ttC/ttT	Phe2351Phe	ORF1ab	C>T
NODE_0000279	NC_045512.2	7417	C	T	NODE_0000283	synonymous_variant	taC/taT	Tyr2384Tyr	ORF1ab	C>T
NODE_0000279	NC_045512.2	7420	C	T	hCoV-19/deer/USA/NY-WTD_164707/2021\EPI_ISL_13610650\2021-11-06	synonymous_variant	atC/atT	Ile2385Ile	ORF1ab	C>T
NODE_0000279	NC_045512.2	7423	C	T	hCoV-19/deer/USA/NY-WTD_119480/2021\EPI_ISL_13610610\2021-10-27	synonymous_variant	ttC/ttT	Phe2386Phe	ORF1ab	C>T
NODE_0000279	NC_045512.2	7829	G	T	NODE_0000282	missense_variant	Gtt/Ttt	Val2522Phe	ORF1ab	G>T
NODE_0000279	NC_045512.2	7945	C	T	hCoV-19/deer/USA/NY-WTD_119459/2021\EPI_ISL_13610602\2021-10-17	synonymous_variant	taC/taT	Tyr2560Tyr	ORF1ab	C>T
NODE_0000279	NC_045512.2	7984	T	G	hCoV-19/deer/USA/NY-WTD_155877/2021\EPI_ISL_13610592\2021-10-02	missense_variant	gaT/gaG	As573Glu	ORF1ab	T>G
NODE_0000279	NC_045512.2	8980	C	T	NODE_0000282	synonymous_variant	taC/taT	Tyr2905Tyr	ORF1ab	C>T
NODE_0000279	NC_045512.2	9430	C	T	NODE_0000280	synonymous_variant	atC/atT	Ile3055Ile	ORF1ab	C>T
NODE_0000279	NC_045512.2	10125	C	T	hCoV-19/deer/USA/NY-WTD_119459/2021\EPI_ISL_13610602\2021-10-17	missense_variant	aCa/aTa	Thr3287Ile	ORF1ab	C>T
NODE_0000279	NC_045512.2	10198	C	T	hCoV-19/deer/USA/NY-WTD_119459/2021\EPI_ISL_13610602\2021-10-17	synonymous_variant	gaC/gaT	As311Asp	ORF1ab	C>T
NODE_0000279	NC_045512.2	11008	C	T	NODE_0000282	synonymous_variant	caC/caT	His3581His	ORF1ab	C>T
NODE_0000279	NC_045512.2	11036	C	T	hCoV-19/deer/USA/NY-WTD_155877/2021\EPI_ISL_13610592\2021-10-02	missense_variant	Ctt/Ttt	Leu3591Phe	ORF1ab	C>T
NODE_0000279	NC_045512.2	11339	C	T	hCoV-19/deer/USA/NY-WTD_155877/2021\EPI_ISL_13610592\2021-10-02	synonymous_variant	Cta/Tta	Leu3692Leu	ORF1ab	C>T
NODE_0000279	NC_045512.2	11339	C	T	hCoV-19/deer/USA/NY-WTD_164707/2021\EPI_ISL_13610650\2021-11-06	synonymous_variant	Cta/Tta	Leu3692Leu	ORF1ab	C>T
NODE_0000279	NC_045512.2	11401	G	T	hCoV-19/deer/USA/NY-WTD_119480/2021\EPI_ISL_13610610\2021-10-27	missense_variant	atG/atT	Met3712Ile	ORF1ab	G>T
NODE_0000279	NC_045512.2	11620	C	T	hCoV-19/deer/USA/NY-WTD_155877/2021\EPI_ISL_13610592\2021-10-02	synonymous_variant	ttC/ttT	Phe3785Phe	ORF1ab	C>T
NODE_0000279	NC_045512.2	11750	C	T	hCoV-19/deer/USA/NY-WTD_119480/2021\EPI_ISL_13610610\2021-10-27	missense_variant	Ctc/Ttc	Leu3829Phe	ORF1ab	C>T
NODE_0000279	NC_045512.2	11824	C	T	hCoV-19/deer/USA/NY-WTD_119459/2021\EPI_ISL_13610602\2021-10-17	synonymous_variant	atC/atT	Ile3853Ile	ORF1ab	C>T
NODE_0000279	NC_045512.2	13187	A	C	hCoV-19/deer/USA/NY-WTD_164707/2021\EPI_ISL_13610650\2021-11-06	missense_variant	Ata/Cta	Ile4308Leu	ORF1ab	A>C
NODE_0000279	NC_045512.2	14676	C	T	hCoV-19/deer/USA/NY-WTD_119505/2021\EPI_ISL_13610625\2021-11-02	synonymous_variant	ccC/ccT	Pro4804Pro	ORF1ab	C>T
NODE_0000279	NC_045512.2	14676	T	C	NODE_0000280	synonymous_variant	ccT/ccC	Pro4804Pro	ORF1ab	T>C
NODE_0000279	NC_045512.2	15141	C	T	hCoV-19/deer/USA/NY-WTD_119459/2021\EPI_ISL_13610602\2021-10-17	synonymous_variant	acC/acT	Thr4959Thr	ORF1ab	C>T
NODE_0000279	NC_045512.2	15212	C	T	hCoV-19/deer/USA/NY-WTD_155877/2021\EPI_ISL_13610592\2021-10-02	missense_variant	aCa/aTa	Thr4983Ile	ORF1ab	C>T
NODE_0000279	NC_045512.2	15240	C	T	hCoV-19/deer/USA/NY-WTD_119505/2021\EPI_ISL_13610625\2021-11-02	synonymous_variant	aaC/aaT	Asn4992Asn	ORF1ab	C>T
NODE_0000279	NC_045512.2	16461	T	C	hCoV-19/deer/USA/NY-WTD_155877/2021\EPI_ISL_13610592\2021-10-02	synonymous_variant	caT/caC	His5399His	ORF1ab	T>C
NODE_0000279	NC_045512.2	17373	C	T	NODE_0000282	synonymous_variant	gcC/gcT	Ala5703Ala	ORF1ab	C>T
NODE_0000279	NC_045512.2	17511	G	A	NODE_0000282	synonymous_variant	gtG/gtA	Val5749Val	ORF1ab	G>A
NODE_0000279	NC_045512.2	18177	T	C	NODE_0000282	synonymous_variant	ccT/ccC	Pro5971Pro	ORF1ab	T>C
NODE_0000279	NC_045512.2	18457	C	T	NODE_0000281	missense_variant	Cca/Tca	Pro6065Ser	ORF1ab	C>T
NODE_0000279	NC_045512.2	18744	C	T	NODE_0000282	synonymous_variant	taC/taT	Tyr6160Tyr	ORF1ab	C>T
NODE_0000279	NC_045512.2	18888	C	T	hCoV-19/deer/USA/NY-WTD_119459/2021\EPI_ISL_13610602\2021-10-17	synonymous_variant	caC/caT	His6208His	ORF1ab	C>T
NODE_0000279	NC_045512.2	19089	C	T	NODE_0000282	synonymous_variant	ttC/ttT	Phe6275Phe	ORF1ab	C>T
NODE_0000279	NC_045512.2	19140	C	T	NODE_0000283	synonymous_variant	ttC/ttT	Phe6292Phe	ORF1ab	C>T
NODE_0000279	NC_045512.2	19156	C	G	NODE_0000282	missense_variant	Cat/Gat	His6298Asp	ORF1ab	C>G
NODE_0000279	NC_045512.2	19170	C	T	hCoV-19/deer/USA/NY-WTD_119505/2021\EPI_ISL_13610625\2021-11-02	synonymous_variant	ttC/ttT	Phe6302Phe	ORF1ab	C>T
NODE_0000279	NC_045512.2	19215	T	C	hCoV-19/deer/USA/NY-WTD_155877/2021\EPI_ISL_13610592\2021-10-02	synonymous_variant	taT/taC	Tyr6317Tyr	ORF1ab	T>C
NODE_0000279	NC_045512.2	19402	C	T	NODE_0000282	missense_variant	Cat/Tat	His6380Tyr	ORF1ab	C>T
NODE_0000279	NC_045512.2	19938	C	T	hCoV-19/deer/USA/NY-WTD_155877/2021\EPI_ISL_13610592\2021-10-02	synonymous_variant	gaC/gaT	As558Asp	ORF1ab	C>T
NODE_0000279	NC_045512.2	20259	C	T	NODE_0000282	synonymous_variant	ttC/ttT	Phe6665Phe	ORF1ab	C>T
NODE_0000279	NC_045512.2	20428	C	T	NODE_0000282	missense_variant	Cct/Tct	Pro6722Ser	ORF1ab	C>T
NODE_0000279	NC_045512.2	21597	C	T	hCoV-19/deer/USA/NY-WTD_119480/2021\EPI_ISL_13610610\2021-10-27	missense_variant	tCt/tTt	Ser12Phe	S	C>T
NODE_0000279	NC_045512.2	22115	A	G	NODE_0000282	missense_variant	Aat/Gat	Asn185Asp	S	A>G
NODE_0000279	NC_045512.2	22118	T	C	NODE_0000282	missense_variant	Ttc/Ctc	Phe186Leu	S	T>C
NODE_0000279	NC_045512.2	22299	G	T	NODE_0000282	missense_variant	aGa/aTa	Arg246Ile	S	G>T
NODE_0000279	NC_045512.2	22525	A	G	hCoV-19/deer/USA/NY-WTD_155877/2021\EPI_ISL_13610592\2021-10-02	synonymous_variant	caA/caG	Gln321Gln	S	A>G
NODE_0000279	NC_045512.2	25317	C	T	hCoV-19/deer/USA/NY-WTD_155877/2021\EPI_ISL_13610592\2021-10-02	missense_variant	tCc/tTc	Ser1252Phe	S	C>T
NODE_0000279	NC_045512.2	25710	C	T	NODE_0000282	synonymous_variant	ctC/ctT	Leu106Leu	ORF3a	C>T
NODE_0000279	NC_045512.2	26125	C	A	hCoV-19/deer/USA/NY-WTD_155877/2021\EPI_ISL_13610592\2021-10-02	missense_variant	Caa/Aaa	Gln245Lys	ORF3a	C>A
NODE_0000279	NC_045512.2	26801	C	T	hCoV-19/deer/USA/NY-WTD_164707/2021\EPI_ISL_13610650\2021-11-06	synonymous_variant	ctC/ctT	Leu93Leu	M	C>T
NODE_0000279	NC_045512.2	27059	C	T	hCoV-19/deer/USA/NY-WTD_155877/2021\EPI_ISL_13610592\2021-10-02	synonymous_variant	taC/taT	Tyr179Tyr	M	C>T
NODE_0000279	NC_045512.2	28011	C	T	NODE_0000280	missense_variant	Cac/Tac	His40Tyr	ORF8	C>T
NODE_0000279	NC_045512.2	28095	A	T	hCoV-19/deer/USA/NY-WTD_119480/2021\EPI_ISL_13610610\2021-10-27	stop_gained	Aaa/Taa	Lys68*	ORF8	A>T
NODE_0000279	NC_045512.2	28095	T	A	NODE_0000280	stop_loss	Taa/Aaa	*68Lys	ORF8	T>A
NODE_0000279	NC_045512.2	28660	C	T	hCoV-19/deer/USA/NY-WTD_155877/2021\EPI_ISL_13610592\2021-10-02	synonymous_variant	ggC/ggT	Gly129Gly	N	C>T
NODE_0000279	NC_045512.2	28697	C	T	NODE_0000282	missense_variant	Cca/Tca	Pro142Ser	N	C>T
NODE_0000279	NC_045512.2	29254	G	T	hCoV-19/deer/USA/NY-WTD_164707/2021\EPI_ISL_13610650\2021-11-06	synonymous_variant	tcG/tcT	Ser327Ser	N	G>T
NODE_0000402	NC_045512.2	335	C	T	hCoV-19/deer/USA/NY-WTD_164487/2021\EPI_ISL_13610630\2021-11-03	missense_variant	Cgc/Tgc	Arg24Cys	ORF1ab	C>T
NODE_0000402	NC_045512.2	885	G	A	NODE_0000408	missense_variant	cGt/cAt	Arg207His	ORF1ab	G>A
NODE_0000402	NC_045512.2	1273	T	A	NODE_0000407	missense_variant	ttT/ttA	Phe336Leu	ORF1ab	T>A
NODE_0000402	NC_045512.2	1274	G	A	NODE_0000407	missense_variant	Gtt/Att	Val337Ile	ORF1ab	G>A
NODE_0000402	NC_045512.2	1636	G	T	NODE_0000407	missense_variant	gaG/gaT	Glu457Asp	ORF1ab	G>T
NODE_0000402	NC_045512.2	1648	C	T	hCoV-19/deer/USA/NY-WTD_164472/2021\EPI_ISL_13658788\2021-11-03	synonymous_variant	atC/atT	Ile461Ile	ORF1ab	C>T
NODE_0000402	NC_045512.2	1968	C	T	NODE_0000408	missense_variant	aCa/aTa	Thr568Ile	ORF1ab	C>T
NODE_0000402	NC_045512.2	2659	G	C	hCoV-19/deer/USA/NY-WTD_164412/2021\EPI_ISL_13610622\2021-11-01	missense_variant	aaG/aaC	Lys798Asn	ORF1ab	G>C
NODE_0000402	NC_045512.2	2867	G	T	NODE_0000408	missense_variant	Gta/Tta	Val868Leu	ORF1ab	G>T
NODE_0000402	NC_045512.2	6723	C	T	NODE_0000408	missense_variant	aCt/aTt	Thr2153Ile	ORF1ab	C>T
NODE_0000402	NC_045512.2	6936	C	T	NODE_0000408	missense_variant	tCt/tTt	Ser2224Phe	ORF1ab	C>T
NODE_0000402	NC_045512.2	7051	C	T	NODE_0000407	synonymous_variant	taC/taT	Tyr2262Tyr	ORF1ab	C>T
NODE_0000402	NC_045512.2	7267	C	T	NODE_0000407	synonymous_variant	ttC/ttT	Phe2334Phe	ORF1ab	C>T
NODE_0000402	NC_045512.2	7303	C	T	hCoV-19/deer/USA/NY-WTD_164489/2021\EPI_ISL_13658793\2021-11-06	synonymous_variant	atC/atT	Ile2346Ile	ORF1ab	C>T
NODE_0000402	NC_045512.2	7303	C	T	hCoV-19/deer/USA/NY-WTD_164472/2021\EPI_ISL_13658788\2021-11-03	synonymous_variant	atC/atT	Ile2346Ile	ORF1ab	C>T
NODE_0000402	NC_045512.2	7303	C	T	hCoV-19/deer/USA/NY-WTD_164412/2021\EPI_ISL_13610622\2021-11-01	synonymous_variant	atC/atT	Ile2346Ile	ORF1ab	C>T
NODE_0000402	NC_045512.2	7334	C	T	NODE_0000407	missense_variant	Cat/Tat	His2357Tyr	ORF1ab	C>T
NODE_0000402	NC_045512.2	7423	C	T	NODE_0000408	synonymous_variant	ttC/ttT	Phe2386Phe	ORF1ab	C>T
NODE_0000402	NC_045512.2	7521	C	T	hCoV-19/deer/USA/NY-WTD_164468/2021\EPI_ISL_13658792\2021-11-06	missense_variant	aCa/aTa	Thr2419Ile	ORF1ab	C>T
NODE_0000402	NC_045512.2	8752	C	T	hCoV-19/deer/USA/NY-WTD_164468/2021\EPI_ISL_13658792\2021-11-06	synonymous_variant	aaC/aaT	Asn2829Asn	ORF1ab	C>T
NODE_0000402	NC_045512.2	8986	C	T	hCoV-19/deer/USA/NY-WTD_164489/2021\EPI_ISL_13658793\2021-11-06	synonymous_variant	gaC/gaT	As907Asp	ORF1ab	C>T
NODE_0000402	NC_045512.2	9430	C	T	NODE_0000406	synonymous_variant	atC/atT	Ile3055Ile	ORF1ab	C>T
NODE_0000402	NC_045512.2	9559	C	T	NODE_0000407	synonymous_variant	taC/taT	Tyr3098Tyr	ORF1ab	C>T
NODE_0000402	NC_045512.2	9588	T	C	hCoV-19/deer/USA/NY-WTD_164487/2021\EPI_ISL_13610630\2021-11-03	missense_variant	aTt/aCt	Ile3108Thr	ORF1ab	T>C
NODE_0000402	NC_045512.2	9598	C	T	NODE_0000407	synonymous_variant	taC/taT	Tyr3111Tyr	ORF1ab	C>T
NODE_0000402	NC_045512.2	9679	C	T	NODE_0000407	synonymous_variant	ttC/ttT	Phe3138Phe	ORF1ab	C>T
NODE_0000402	NC_045512.2	9711	C	T	NODE_0000407	missense_variant	tCc/tTc	Ser3149Phe	ORF1ab	C>T
NODE_0000402	NC_045512.2	9893	C	T	NODE_0000407	missense_variant	Ctt/Ttt	Leu3210Phe	ORF1ab	C>T
NODE_0000402	NC_045512.2	9907	C	T	hCoV-19/deer/USA/NY-WTD_164487/2021\EPI_ISL_13610630\2021-11-03	synonymous_variant	taC/taT	Tyr3214Tyr	ORF1ab	C>T
NODE_0000402	NC_045512.2	10029	C	T	NODE_0000407	missense_variant	aCc/aTc	Thr3255Ile	ORF1ab	C>T
NODE_0000402	NC_045512.2	10156	C	T	NODE_0000408	synonymous_variant	gaC/gaT	As297Asp	ORF1ab	C>T
NODE_0000402	NC_045512.2	10889	C	T	NODE_0000408	missense_variant	Cgt/Tgt	Arg3542Cys	ORF1ab	C>T
NODE_0000402	NC_045512.2	11161	G	A	hCoV-19/deer/USA/NY-WTD_164468/2021\EPI_ISL_13658792\2021-11-06	synonymous_variant	aaG/aaA	Lys3632Lys	ORF1ab	G>A
NODE_0000402	NC_045512.2	11195	C	T	NODE_0000408	missense_variant	Ctt/Ttt	Leu3644Phe	ORF1ab	C>T
NODE_0000402	NC_045512.2	11344	C	T	NODE_0000407	synonymous_variant	atC/atT	Ile3693Ile	ORF1ab	C>T
NODE_0000402	NC_045512.2	11710	T	C	NODE_0000409	synonymous_variant	gtT/gtC	Val3815Val	ORF1ab	T>C
NODE_0000402	NC_045512.2	12357	C	T	NODE_0000407	missense_variant	aCa/aTa	Thr4031Ile	ORF1ab	C>T
NODE_0000402	NC_045512.2	12469	C	T	hCoV-19/deer/USA/NY-WTD_164468/2021\EPI_ISL_13658792\2021-11-06	synonymous_variant	gcC/gcT	Ala4068Ala	ORF1ab	C>T
NODE_0000402	NC_045512.2	13019	C	T	NODE_0000408	synonymous_variant	Cta/Tta	Leu4252Leu	ORF1ab	C>T
NODE_0000402	NC_045512.2	13130	C	A	NODE_0000408	missense_variant	Caa/Aaa	Gln4289Lys	ORF1ab	C>A
NODE_0000402	NC_045512.2	13665	C	T	hCoV-19/deer/USA/NY-WTD_164468/2021\EPI_ISL_13658792\2021-11-06	synonymous_variant	caC/caT	His4467His	ORF1ab	C>T
NODE_0000402	NC_045512.2	14097	C	T	NODE_0000408	synonymous_variant	ttC/ttT	Phe4611Phe	ORF1ab	C>T
NODE_0000402	NC_045512.2	14676	T	C	hCoV-19/deer/USA/NY-WTD_164487/2021\EPI_ISL_13610630\2021-11-03	synonymous_variant	ccT/ccC	Pro4804Pro	ORF1ab	T>C
NODE_0000402	NC_045512.2	14676	T	C	NODE_0000410	synonymous_variant	ccT/ccC	Pro4804Pro	ORF1ab	T>C
NODE_0000402	NC_045512.2	15222	C	T	NODE_0000408	synonymous_variant	ttC/ttT	Phe4986Phe	ORF1ab	C>T
NODE_0000402	NC_045512.2	16359	A	G	hCoV-19/deer/USA/NY-WTD_164472/2021\EPI_ISL_13658788\2021-11-03	synonymous_variant	ttA/ttG	Leu5365Leu	ORF1ab	A>G
NODE_0000402	NC_045512.2	17140	G	T	NODE_0000407	missense_variant	Gct/Tct	Ala5626Ser	ORF1ab	G>T
NODE_0000402	NC_045512.2	17703	C	T	hCoV-19/deer/USA/NY-WTD_164468/2021\EPI_ISL_13658792\2021-11-06	synonymous_variant	aaC/aaT	Asn5813Asn	ORF1ab	C>T
NODE_0000402	NC_045512.2	17738	C	T	hCoV-19/deer/USA/NY-WTD_164468/2021\EPI_ISL_13658792\2021-11-06	missense_variant	aCa/aTa	Thr5825Ile	ORF1ab	C>T
NODE_0000402	NC_045512.2	19333	G	T	NODE_0000407	missense_variant	Gat/Tat	As357Tyr	ORF1ab	G>T
NODE_0000402	NC_045512.2	19955	C	T	NODE_0000407	missense_variant	aCt/aTt	Thr6564Ile	ORF1ab	C>T
NODE_0000402	NC_045512.2	20115	C	T	NODE_0000407	synonymous_variant	gtC/gtT	Val6617Val	ORF1ab	C>T
NODE_0000402	NC_045512.2	20148	C	T	hCoV-19/deer/USA/NY-WTD_164468/2021\EPI_ISL_13658792\2021-11-06	synonymous_variant	ttC/ttT	Phe6628Phe	ORF1ab	C>T
NODE_0000402	NC_045512.2	20283	C	T	NODE_0000408	synonymous_variant	ttC/ttT	Phe6673Phe	ORF1ab	C>T
NODE_0000402	NC_045512.2	20753	A	G	NODE_0000406	missense_variant	gAt/gGt	As830Gly	ORF1ab	A>G
NODE_0000402	NC_045512.2	21549	C	T	NODE_0000408	synonymous_variant	aaC/aaT	Asn7095Asn	ORF1ab	C>T
NODE_0000402	NC_045512.2	21552	C	T	NODE_0000407	synonymous_variant	aaC/aaT	Asn7096Asn	ORF1ab	C>T
NODE_0000402	NC_045512.2	21682	C	T	NODE_0000408	synonymous_variant	gaC/gaT	As0Asp	S	C>T
NODE_0000402	NC_045512.2	21969	G	C	NODE_0000408	missense_variant	tGt/tCt	Cys136Ser	S	G>C
NODE_0000402	NC_045512.2	22305	A	G	NODE_0000407	missense_variant	tAt/tGt	Tyr248Cys	S	A>G
NODE_0000402	NC_045512.2	22336	G	C	NODE_0000406	missense_variant	tgG/tgC	Tr58Cys	S	G>C
NODE_0000402	NC_045512.2	22712	C	T	hCoV-19/deer/USA/NY-WTD_164468/2021\EPI_ISL_13658792\2021-11-06	missense_variant	Cct/Tct	Pro384Ser	S	C>T
NODE_0000402	NC_045512.2	23114	C	T	NODE_0000407	synonymous_variant	Cta/Tta	Leu518Leu	S	C>T
NODE_0000402	NC_045512.2	23264	G	A	NODE_0000407	missense_variant	Gac/Aac	As68Asn	S	G>A
NODE_0000402	NC_045512.2	23268	T	C	NODE_0000407	missense_variant	aTt/aCt	Ile569Thr	S	T>C
NODE_0000402	NC_045512.2	24919	C	T	NODE_0000408	synonymous_variant	aaC/aaT	Asn1119Asn	S	C>T
NODE_0000402	NC_045512.2	25515	C	T	NODE_0000407	synonymous_variant	ctC/ctT	Leu41Leu	ORF3a	C>T
NODE_0000402	NC_045512.2	26428	G	T	NODE_0000408	missense_variant	Gtt/Ttt	Val62Phe	E	G>T
NODE_0000402	NC_045512.2	26801	C	T	hCoV-19/deer/USA/NY-WTD_164468/2021\EPI_ISL_13658792\2021-11-06	synonymous_variant	ctC/ctT	Leu93Leu	M	C>T
NODE_0000402	NC_045512.2	26810	C	T	NODE_0000408	synonymous_variant	ttC/ttT	Phe96Phe	M	C>T
NODE_0000402	NC_045512.2	27059	C	T	NODE_0000408	synonymous_variant	taC/taT	Tyr179Tyr	M	C>T
NODE_0000402	NC_045512.2	27779	C	T	NODE_0000407	synonymous_variant	gaC/gaT	AsAsp	ORF7b	C>T
NODE_0000402	NC_045512.2	27864	C	T	NODE_0000407	missense_variant	Cat/Tat	His37Tyr	ORF7b	C>T
NODE_0000402	NC_045512.2	28011	C	T	NODE_0000408	missense_variant	Cac/Tac	His40Tyr	ORF8	C>T
NODE_0000402	NC_045512.2	28021	C	T	NODE_0000406	missense_variant	tCt/tTt	Ser43Phe	ORF8	C>T
NODE_0000402	NC_045512.2	28095	T	A	NODE_0000408	stop_loss	Taa/Aaa	*68Lys	ORF8	T>A
NODE_0000402	NC_045512.2	29000	G	T	NODE_0000407	missense_variant	Ggc/Tgc	Gly243Cys	N	G>T
NODE_0000402	NC_045512.2	29668	C	T	NODE_0000408	synonymous_variant	ctC/ctT	Leu37Leu	ORF10	C>T
